# Supplementary material for: Fate of manuscripts rejected by a non-English-language general medical journal: a retrospective cohort study
Source: PubMed Central journal article supplement — BMJ Open. 2011 Aug 4;1(1):e000147. doi: 10.1136/bmjopen-2011-000147 (PMC3191426; doi:10.1136/bmjopen-2011-000147), 2011-08-04
Supplement: bmjopen-2011-000147.draft_revisions.pdf [file bmjopen-2011-000147.draft_revisions.pdf]

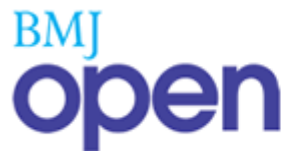

### Fate of manuscripts rejected by a non-English general medical journal

|                               |                                                                                     |
|-------------------------------|-------------------------------------------------------------------------------------|
| Journal:                      | <i>BMJ Open</i>                                                                     |
| Manuscript ID:                | bmjopen-2011-000147                                                                 |
| Article Type:                 | Research                                                                            |
| Date Submitted by the Author: | 26-Apr-2011                                                                         |
| Complete List of Authors:     | Vinther, Siri; Herlev Hospital, University of Copenhagen, Surgical Gastroenterology |
| <b>Subject Heading</b>:       | Journalology                                                                        |
| Keywords:                     | MEDICAL JOURNALISM, MEDICAL ETHICS, BIOTECHNOLOGY & BIOINFORMATICS                  |
|                               |                                                                                     |

SCHOLARONE™  
Manuscripts

Peer review only

1  
2  
3  
4  
5  
6  
7  
8  
9  
10  
11  
12  
13  
14  
15  
16  
17  
18  
19  
20  
21  
22  
23  
24  
25  
26  
27  
28  
29  
30  
31  
32  
33  
34  
35  
36  
37  
38  
39  
40  
41  
42  
43  
44  
45  
46  
47  
48  
49  
50  
51  
52  
53  
54  
55  
56  
57  
58  
59  
60

**Fate of manuscripts rejected by a non-English general medical journal -  
a retrospective cohort study**

Siri Vinther, MS<sup>2</sup>

Jacob Rosenberg, MD, DSc<sup>1,2</sup>

1 Ugeskrift for Læger (Journal of the Danish Medical Association), Kristianiagade 12, 2100 Copenhagen,  
Denmark

2 Department of Surgical Gastroenterology, Herlev Hospital, University of Copenhagen, 2730 Herlev,  
Denmark

Correspondence regarding the manuscript to:

Siri Vinther

E-mail: sirivinther@hotmail.com

Word count: 1544

## Abstract

### Objective

The objective of this study was to determine whether, where and when manuscripts were published following rejection by the Journal of the Danish Medical Association - a general medical journal published in Danish. Similar previous studies have focused on specialty/subspecialty journals published in English.

### Design

Manuscripts rejected during a four-year period were searched for in PubMed and Embase in order to assess the percentage of manuscripts subsequently published in other journals. In addition, characteristics of both the published manuscripts and the journals they were published in were evaluated.

### Results

Of 198 rejected manuscripts, 21 (10.6%) were eventually published after a median of 685 days (range 209-1463). The majority of these were original research, published in English specialty/subspecialty journals. The median number of citations per article was 2-3 (depending of the database searched).

### Conclusions

10.6% of the rejected manuscripts were eventually published in other journals, mainly English specialty journals. This publication rate differs notably from those found in previous studies. Manuscript translation could be a barrier for resubmitting to English journals with larger readerships, thus hindering the dissemination of knowledge to the international community.

## Article summary

### *Article focus*

- To determine whether, where and when manuscripts were published following rejection by a general medical journal published in another language than English

### *Key messages*

- 10.6% of the rejected manuscripts were eventually published in other journals; a publication rate differing notably from that found in previous studies.
- Manuscript translation could be a barrier for resubmitting to English journals with larger readerships. Scientific journals publishing in small languages should consider publishing original research in a major language like English in order to facilitate the dissemination of scientific results

### *Strengths and limitations of this study*

- PubMed and Embase were used to search for rejected manuscript eventually published in other (indexed) journals; previous studies have searched only PubMed for rejected manuscripts. However, even when searching both databases, the number of search results (published manuscripts) would most likely be an underestimate as some manuscripts could be published in non-indexed journals.
- This study deals with a general medical journal published in small language; previous studies have focused on speciality/sub-speciality journals published in English.

This research received no specific grant from any funding agency in the public, commercial or not-for-profit sectors.

The authors have no relevant conflicts of interest regarding the present paper.

## Objective

Since 1839, Journal of the Danish Medical Association (Ugeskrift for Læger - UfL) has been published on a weekly basis. It is one of the oldest general medical journals in the world – and the only Danish, peer-reviewed medical journal indexed in Medline.

The journal publishes editorials, original articles, systematic reviews, non-systematic reviews and case reports with an average of 10 articles per week.

UfL is published in Danish and thus serves a relatively little readership. Yet, the fate of manuscripts rejected by UfL is not only of national interest. This study could disclose that science communicated in a (small) national language may not cross borders. This could be of particular concern when no national alternative for manuscript resubmission exists. Then, language alone precludes the dissemination of knowledge that could otherwise benefit national as well as international scientific communities.

Previous studies about fate of rejected manuscripts have all dealt with speciality or sub-speciality journals published in English (1-11). In these studies, more than half of the manuscripts initially rejected were eventually published in another journal.

The aim of this study was to establish whether the same may be applicable for a general medical journal published in another language than English.

## Methods

Using a retrospective cohort study design, access to all rejected manuscripts from the years 2002-2005 was obtained. All unsolicited rejected manuscripts were included in the study, a total of 198. For each manuscript, data about manuscript type, author(s), peer reviewer(s), date of acceptance and date of refusal were available. In addition, a copy of the editorial rejection letter provided information about the reason(s) for rejection.

1  
2  
3  
4 PubMed and Embase were used to search for rejected manuscript eventually published in other (indexed)  
5  
6 journals. By default, only the first author's surname and initials were searched for. If the author had a very  
7  
8 common name, a combination of the first author's surname and the last author's surname was tried. If only  
9  
10 one author was listed, a combination of the author's surname and a subject keyword was tried.  
11  
12

13  
14  
15 When searching PubMed and Embase for manuscripts, the time interval was not restricted. In this way,  
16  
17 potential attempts at duplication could be detected (authors having submitted their manuscript to another  
18  
19 journal (and getting published) in addition to submitting to UfL). A non-restricted time interval would also  
20  
21 give a sufficient opportunity for a manuscript to be published elsewhere.  
22  
23

24  
25 When a search yielded a potential result in PubMed, Embase or both, the abstract was read. If any doubt  
26  
27 existed as to whether the publication corresponded to the manuscript once rejected by UfL, the article was  
28  
29 downloaded and read thoroughly. If doubt persisted, the corresponding author was contacted asking  
30  
31 whether this specific manuscript rejected by UfL had been published elsewhere.  
32  
33

34  
35 For each year (2002-2005) the number of submitted manuscripts, rejected manuscripts and manuscripts  
36  
37 subsequently published in (indexed) journals was counted. The proportion between rejected manuscripts  
38  
39 and total number of submissions and also the proportion between manuscripts published elsewhere and  
40  
41 rejected manuscripts were then calculated. Finally, the distribution of the manuscript types submitted to UfL  
42  
43 and the distribution of the manuscript types published elsewhere were analysed.  
44  
45

46  
47  
48 For every published manuscript, the following was recorded: manuscript type (original research, systematic  
49  
50 review, non-systematic review, case report), reason for rejection by UfL and finally the number of citations  
51  
52 in Web of Science and Google Scholar (search performed mid-March 2011) (12;13).  
53  
54

55  
56 For every publishing journal, the following was recorded: subject of journal, language, and finally the journal  
57  
58 impact factor (in the year of publishing) (14).  
59  
60

## Results

Table 1 shows the number of submitted manuscripts to UfL, the number of rejected manuscripts, the proportion between rejected manuscripts and submissions, the number of manuscripts published elsewhere and the proportion between manuscripts published elsewhere and manuscripts rejected by UfL. A total of 198 manuscripts were rejected during the years 2002-2005, and of these, 21 were subsequently published elsewhere.

Table 2 shows characteristics of the 19 journals that eventually published the 21 manuscripts. All of the articles were published in English.

17 journals were rated for impact by the Institute for Scientific Information (14).

With regard to subject, the majority of journals would be categorized as speciality/sub-speciality journals.

The median time from submission to UfL to publication elsewhere was 685 days (range 209-1463). Six manuscripts were published within one year of the original submission to UfL, six manuscripts were published within two years and nine manuscripts were published more than two years after the submission to UfL.

Looking at the distribution of the submissions for the years 2002, 2003, 2004 and 2005, UfL received most non-systematic reviews (~32%). Original research, case reports and systematic reviews constituted 27%, 19% and 15% of submissions, respectively. Of the rejected manuscripts that were published elsewhere, the original research manuscripts constituted 43% and case reports, systematic reviews and non-systematic reviews constituted 29%, 14% and 10%, respectively.

Of the rejected manuscripts that were eventually published elsewhere, those of original research constituted 11%.

As a measure of importance, the number of citations that each article received since its publication was also studied. As the number of citations can differ significantly depending on the database searched, it was

1  
2  
3  
4 considered relevant to search both Web of Science and Google Scholar (last-mentioned providing  
5 information about manuscripts published in journals not indexed by Web of Science) (12;14).  
6  
7

8 For Web of Science, the median number of citations was 2; the inter-quartile range was 0.5-6. The total  
9 number of citations was 104. For Google Scholar, the median number of citation was 3; the inter-quartile  
10 range was 1.5-9.5. The total number of citations was 153. Only two manuscripts have received more than  
11 10 citations in both Web of Science and Google Scholar (both published in "Basic clinical pharmacology &  
12 toxicology").  
13  
14  
15  
16  
17

## 21 Discussion

22  
23  
24  
25 This study found that 10.6% of the manuscripts rejected by a non-English general medical journal were  
26 subsequently published in other journals. The majority of these manuscripts were published in  
27 speciality/sub-speciality journals. The publication rate of 10.6% differs notably from publication rates found  
28 in previous studies (1-11).  
29  
30  
31  
32

33  
34  
35 The majority of manuscripts submitted to UfL between 2002 and 2005 were non-systematic reviews.  
36 However, rejected manuscripts of original research were published more often than other manuscript types.  
37 Perhaps, authors of original research do not consider the process of translating and resubmitting as  
38 laborious as other authors might do. However, it could also be a reflection of editorial selections or  
39 preferences for original research.  
40  
41  
42  
43  
44  
45

46  
47  
48 The use of impact factor has been widely criticised and there is an ongoing discussion about the usefulness  
49 of this citation metric. However, when evaluating the relative importance of journals within the same field, it  
50 is at present the most common metric. UfL is not indexed in Journal Citation Reports (JCR) for which obvious  
51 reason comparisons of impact factors cannot be made. However, even if UfL was indexed in JCR, it would  
52 not make sense to do a comparative analysis of the impact factors since most of the manuscripts rejected by  
53 UfL – a general medical journal - were eventually published in English speciality/sub-speciality journals.  
54  
55  
56  
57  
58  
59  
60



1  
2  
3  
4 Previous studies have dealt with speciality or sub-speciality journals for which reason it has been more  
5 obvious to compare impact factors (between journals within the same field). Overall, it seems that  
6 publication is attempted first in a journal with a relatively high impact factor. If the manuscript is rejected, it  
7 is then submitted to a journal with higher acceptance rate and lower (or no) impact factor, e.g. to national  
8 journals publishing in non-English like UfL. If the manuscript is again rejected, there are not many places left  
9 to go. This could explain that the proportion between manuscripts published elsewhere and manuscripts  
10 rejected by UfL is so much lower than that found in any other study.  
11  
12  
13  
14  
15  
16  
17  
18

19  
20 Previous studies have searched only PubMed for rejected manuscripts. This involves a risk of missing  
21 manuscripts published in journals not indexed in this database. When searching for medical literature,  
22 Embase is generally regarded an important supplement to PubMed, especially when it comes to European  
23 literature (15-18). Searching both PubMed and Embase was important in the present study as two additional  
24 manuscripts were retrieved by searching Embase. However, even when searching both databases, the  
25 number of search results (published manuscripts) would most likely be an underestimate as some  
26 manuscripts could be published in non-indexed journals.  
27  
28  
29  
30  
31  
32  
33  
34  
35  
36

37 This study differs significantly from previous studies because it deals with a general medical journal  
38 published in small language (Danish is spoken by only 0.08% of the world population). Previous studies have  
39 focused on speciality/sub-speciality journals published in English. It seems like a reasonable assumption that  
40 language, including translation of manuscripts, could be a potential barrier for resubmission to other  
41 journals. In this study, the manuscripts of original research constituted 11% of the total number of rejected  
42 manuscripts that were eventually published elsewhere. In other words, 89% of the original research rejected  
43 by UfL in this four-year period were probably shelved and never made accessible.  
44  
45  
46  
47  
48  
49  
50  
51  
52  
53

54 In a broader perspective, this implies that scientific results initially communicated in a small language have  
55 international reach only in rare instances. Scientific journals publishing in small languages should consider  
56 publishing original research in a major language like English in order to facilitate the dissemination of  
57  
58  
59  
60

1  
2  
3  
4  
5  
6  
7  
8  
9  
10  
11  
12  
13  
14  
15  
16  
17  
18  
19  
20  
21  
22  
23  
24  
25  
26  
27  
28  
29  
30  
31  
32  
33  
34  
35  
36  
37  
38  
39  
40  
41  
42  
43  
44  
45  
46  
47  
48  
49  
50  
51  
52  
53  
54  
55  
56  
57  
58  
59  
60

scientific results. Since 2009, UfL has not published original research in Danish; all original articles are published in English in the open-access journal Danish Medical Bulletin (19;20).

For peer review only

## Author contributions

SV and JR made substantial contributions to conception and design, SV was responsible for acquisition of data and initial analysis, SV and JR participated in the interpretation of data; SV drafted the article, and SV and JR revised it critically for important intellectual content; SV and JR gave final approval of the version to be published.

SV had full access to all of the data in the study and takes responsibility for the integrity of the data and the accuracy of the data analysis.

For peer review only

## Reference List

- 1  
2  
3  
4  
5  
6  
7 (1) Wijnhoven BP, Dejong CH. Fate of manuscripts declined by the British Journal of Surgery. *Br J Surg* 2010 Mar;97(3):450-4.
- 8  
9  
10 (2) Liesegang TJ, Shaikh M, Crook JE. The outcome of manuscripts submitted to the American Journal  
11 of Ophthalmology between 2002 and 2003. *Am J Ophthalmol* 2007 Apr;143(4):551-60.
- 12  
13 (3) Silberzweig JE, Khorsandi AS. Outcomes of rejected Journal of Vascular and Interventional Radiology  
14 manuscripts. *J Vasc Interv Radiol* 2008 Nov;19(11):1620-3.
- 15  
16 (4) Dewan P, Gupta P, Shah D. Fate of articles rejected by Indian Pediatrics. *Indian Pediatr* 2010  
17 Dec;47(12):1031-5.
- 18  
19 (5) Chew FS. Fate of manuscripts rejected for publication in the AJR. *AJR Am J Roentgenol* 1991  
20 Mar;156(3):627-32.
- 21  
22 (6) Armstrong AW, Idriss SZ, Kimball AB, Bernhard JD. Fate of manuscripts declined by the Journal of  
23 the American Academy of Dermatology. *J Am Acad Dermatol* 2008 Apr;58(4):632-5.
- 24  
25 (7) Ray J, Berkwits M, Davidoff F. The fate of manuscripts rejected by a general medical journal. *Am J*  
26 *Med* 2000 Aug 1;109(2):131-5.
- 27  
28 (8) McDonald RJ, Cloft HJ, Kallmes DF. Fate of submitted manuscripts rejected from the American  
29 Journal of Neuroradiology: outcomes and commentary. *AJNR Am J Neuroradiol* 2007  
30 Sep;28(8):1430-4.
- 31  
32 (9) McDonald RJ, Cloft HJ, Kallmes DF. Fate of manuscripts previously rejected by the American Journal  
33 of Neuroradiology: a follow-up analysis. *AJNR Am J Neuroradiol* 2009 Feb;30(2):253-6.
- 34  
35 (10) Nemery B. What happens to the manuscripts that have not been accepted for publication in  
36 Occupational and Environmental Medicine? *Occup Environ Med* 2001 Sep;58(9):604-7.
- 37  
38 (11) Hall SA, Wilcox AJ. The fate of epidemiologic manuscripts: a study of papers submitted to  
39 epidemiology. *Epidemiology* 2007 Mar;18(2):262-5.
- 40  
41 (12) Google. Google Scholar. [http://scholar google dk/](http://scholar.google.dk/) 2011 March 14
- 42  
43 (13) ISI Web of Knowledge. Web of Science. [http://apps isiknowledge com ep fjernadgang kb  
44 dk/WOS\\_GeneralSearch\\_input  
45 do?product=WOS&search\\_mode=GeneralSearch&SID=R2pIPf75MpOIaOmolC@&preferencesSaved=  
46 2011](http://apps.isiknowledge.com/epfjernadgang.kb.dk/WOS_GeneralSearch_input.do?product=WOS&search_mode=GeneralSearch&SID=R2pIPf75MpOIaOmolC@&preferencesSaved=2011)
- 47  
48 (14) ISI Web of Knowledge. Journal Citation Reports. [http://admin-apps isiknowledge com ep  
49 fjernadgang kb dk/JCR/JCR?PointOfEntry=Home&SID=N115PeIPck2NBnb88i3](http://admin-apps.isiknowledge.com/epfjernadgang.kb.dk/JCR/JCR?PointOfEntry=Home&SID=N115PeIPck2NBnb88i3) 2011 March 14
- 50  
51 (15) Fangerau H. Finding European bioethical literature: an evaluation of the leading abstracting and  
52 indexing services. *J Med Ethics* 2004 Jun;30(3):299-303.
- 53  
54 (16) Wilkins T, Gillies RA, Davies K. EMBASE versus MEDLINE for family medicine searches: can MEDLINE  
55 searches find the forest or a tree? *Can Fam Physician* 2005 Jun;51:848-9.
- 56  
57 (17) Kelly L, St Pierre-Hansen N. So many databases, such little clarity: Searching the literature for the  
58 topic aboriginal. *Can Fam Physician* 2008 Nov;54(11):1572-3.
- 59  
60

- 1  
2  
3  
4  
5 (18) Woods D, Trewheellar K. Medline and Embase complement each other in literature searches. BMJ  
6 1998 Apr 11;316(7138):1166.  
7  
8 (19) Rosenberg J. [Danish versus English in Ugeskrift for Laeger]. Ugeskr Laeger 2009 Jun  
9 1;171(23):1911.  
10  
11 (20) Danish Medical Bulletin. Danish Medical Bulletin. www danmedbul dk 2011  
12  
13 (21) [www.ulrichsweb.com](http://www.ulrichsweb.com). Global series directory. [http://www](http://www.ulrichsweb.com/ep/fjernadgang/kb/dk/ulrichsweb/Search/fullCitation.asp?navPage=1&tab=1&serial_uid=18616&issn=00415782)  
14 [ulrichsweb com ep fjernadgang kb](http://www.ulrichsweb.com/ep/fjernadgang/kb/dk/ulrichsweb/Search/fullCitation.asp?navPage=1&tab=1&serial_uid=18616&issn=00415782)  
15 [dk/ulrichsweb/Search/fullCitation asp?navPage=1&tab=1&serial\\_uid=18616&issn=00415782](http://www.ulrichsweb.com/ep/fjernadgang/kb/dk/ulrichsweb/Search/fullCitation.asp?navPage=1&tab=1&serial_uid=18616&issn=00415782) 2011  
16 March 14  
17  
18  
19  
20  
21  
22  
23  
24  
25  
26  
27  
28  
29  
30  
31  
32  
33  
34  
35  
36  
37  
38  
39  
40  
41  
42  
43  
44  
45  
46  
47  
48  
49  
50  
51  
52  
53  
54  
55  
56  
57  
58  
59  
60

For peer review only

1  
2  
3  
4  
5  
6  
7  
8  
9  
10  
11  
12  
13  
14  
15  
16  
17  
18  
19  
20  
21  
22  
23  
24  
25  
26  
27  
28  
29  
30  
31  
32  
33  
34  
35  
36  
37  
38  
39  
40  
41  
42  
43  
44  
45  
46  
47  
48  
49  
50  
51  
52  
53  
54  
55  
56  
57  
58  
59  
60

Table 1: Manuscripts – submitted, rejected and published elsewhere

| <i>Year</i> | <i>Submitted manuscripts</i> | <i>Rejected manuscripts</i> | <i>Rejected manuscripts (% of submissions)</i> | <i>Manuscripts subsequently published elsewhere</i> | <i>Published elsewhere (% of rejected manuscripts)</i> |
|-------------|------------------------------|-----------------------------|------------------------------------------------|-----------------------------------------------------|--------------------------------------------------------|
| 2002        | 555                          | 58                          | 10.5                                           | 7                                                   | 12.1                                                   |
| 2003        | 707                          | 51                          | 7.2                                            | 8                                                   | 15.7                                                   |
| 2004        | 585                          | 52                          | 8.9                                            | 4                                                   | 7.7                                                    |
| 2005        | 593                          | 37                          | 6.2                                            | 2                                                   | 5.4                                                    |
| Total       | 2440                         | 198                         | 8.1                                            | 21                                                  | 10.6                                                   |

For peer review only

Table 2: Characteristics of the publishing journals

| <i>Journal</i>                                                                 | <i>Year of publication</i> | <i>Impact factor (year of publication)</i> | <i>Subject of journal (21)</i>                                                     | <i>Language of journal</i> |
|--------------------------------------------------------------------------------|----------------------------|--------------------------------------------|------------------------------------------------------------------------------------|----------------------------|
| Acta Radiologica                                                               | 2006                       | 0.884                                      | Radiology and nuclear medicine                                                     | English                    |
| Acupuncture in Medicine                                                        | 2002                       |                                            | Alternative medicine                                                               | English                    |
| American journal of cancer (ceased)                                            | 2004                       |                                            | Oncology                                                                           | English                    |
| American journal of case reports                                               | 2008                       |                                            | Medical sciences                                                                   | English                    |
| Archives of gynecology and obstetrics                                          | 2006                       | 0.666 (2007)                               | Obstetrics and gynecology                                                          | English                    |
| Basic and clinical pharmacology & toxicology*                                  | 2003+<br>2004              | 1.489 (2005)                               | Pharmacy, pharmacology; environmental studies, toxicology and environmental safety | English                    |
| Clinical rheumatology                                                          | 2008                       | 1.559                                      | Rheumatology                                                                       | English                    |
| Current medical research and opinion                                           | 2006                       | 3.062                                      | Medical sciences                                                                   | English                    |
| Homeopathy                                                                     | 2006                       | 1.041 (2008)                               | Chiropractic, homeopathy, osteopathy                                               | English                    |
| International journal for quality in health care                               | 2004                       | 1.138 (2005)                               | Medical sciences                                                                   | English                    |
| International Journal of Hygiene and Environmental Health                      | 2007                       | 1.621                                      | Public health and safety                                                           | English                    |
| International urology and nephrology                                           | 2007                       | 0.482                                      | Urology and nephrology                                                             | English                    |
| Journal of clinical densitometry                                               | 2005                       | 1.871                                      | Medical sciences                                                                   | English                    |
| Medical hypotheses                                                             | 2005                       | 0.92                                       | Medical sciences                                                                   | English                    |
| International Journal of Clinical Pharmacy                                     | 2006                       | 0.941                                      | Pharmacy and pharmacology                                                          | English                    |
| Scandinavian journal of infectious diseases                                    | 2003                       | 1.308 (2005)                               | Communicable diseases                                                              | English                    |
| Scandinavian journal of primary health care                                    | 2006                       | 1.541                                      | Nurses and nursing; health facilities and administration                           | English                    |
| Surgical laparoscopy endoscopy & percutaneous techniques                       | 2005                       | 0.865                                      | Surgery; gastroenterology; obstetrics and gynecology                               | English                    |
| Vaccine                                                                        | 2004                       | 2.822 (2005)                               | Allergology and immunology; veterinary science                                     | English                    |
| *formerly Pharmacology and Toxicology<br>**formerly Pharmacy world and science |                            |                                            |                                                                                    |                            |

1  
2  
3  
4  
5  
6  
7  
8  
9  
10  
11  
12  
13  
14  
15  
16  
17  
18  
19  
20  
21  
22  
23  
24  
25  
26  
27  
28  
29  
30  
31  
32  
33  
34  
35  
36  
37  
38  
39  
40  
41  
42  
43  
44  
45  
46  
47  
48  
49  
50  
51  
52  
53  
54  
55  
56  
57  
58  
59  
60

For peer review only



**STROBE 2007 (v4) checklist of items to be included in reports of observational studies in epidemiology\***  
**Checklist for cohort, case-control, and cross-sectional studies (combined)**

| Section/Topic             | Item # | Recommendation                                                                                                                                                                                                                                                                                                                                                                                                                                                         | Reported on page # |
|---------------------------|--------|------------------------------------------------------------------------------------------------------------------------------------------------------------------------------------------------------------------------------------------------------------------------------------------------------------------------------------------------------------------------------------------------------------------------------------------------------------------------|--------------------|
| Title and abstract        | 1      | (a) Indicate the study's design with a commonly used term in the title or the abstract                                                                                                                                                                                                                                                                                                                                                                                 | 1                  |
|                           |        | (b) Provide in the abstract an informative and balanced summary of what was done and what was found                                                                                                                                                                                                                                                                                                                                                                    | 2                  |
| <b>Introduction</b>       |        |                                                                                                                                                                                                                                                                                                                                                                                                                                                                        |                    |
| Background/rationale      | 2      | Explain the scientific background and rationale for the investigation being reported                                                                                                                                                                                                                                                                                                                                                                                   | 4                  |
| Objectives                | 3      | State specific objectives, including any pre-specified hypotheses                                                                                                                                                                                                                                                                                                                                                                                                      | 4                  |
| <b>Methods</b>            |        |                                                                                                                                                                                                                                                                                                                                                                                                                                                                        |                    |
| Study design              | 4      | Present key elements of study design early in the paper                                                                                                                                                                                                                                                                                                                                                                                                                | 4-5                |
| Setting                   | 5      | Describe the setting, locations, and relevant dates, including periods of recruitment, exposure, follow-up, and data collection                                                                                                                                                                                                                                                                                                                                        |                    |
| Participants              | 6      | (a) <i>Cohort study</i> —Give the eligibility criteria, and the sources and methods of selection of participants. Describe methods of follow-up<br><i>Case-control study</i> —Give the eligibility criteria, and the sources and methods of case ascertainment and control selection. Give the rationale for the choice of cases and controls<br><i>Cross-sectional study</i> —Give the eligibility criteria, and the sources and methods of selection of participants | 4-5                |
|                           |        | (b) <i>Cohort study</i> —For matched studies, give matching criteria and number of exposed and unexposed<br><i>Case-control study</i> —For matched studies, give matching criteria and the number of controls per case                                                                                                                                                                                                                                                 |                    |
| Variables                 | 7      | Clearly define all outcomes, exposures, predictors, potential confounders, and effect modifiers. Give diagnostic criteria, if applicable                                                                                                                                                                                                                                                                                                                               | 5                  |
| Data sources/ measurement | 8*     | For each variable of interest, give sources of data and details of methods of assessment (measurement). Describe comparability of assessment methods if there is more than one group                                                                                                                                                                                                                                                                                   |                    |
| Bias                      | 9      | Describe any efforts to address potential sources of bias                                                                                                                                                                                                                                                                                                                                                                                                              |                    |
| Study size                | 10     | Explain how the study size was arrived at                                                                                                                                                                                                                                                                                                                                                                                                                              |                    |
| Quantitative variables    | 11     | Explain how quantitative variables were handled in the analyses. If applicable, describe which groupings were chosen and why                                                                                                                                                                                                                                                                                                                                           |                    |
| Statistical methods       | 12     | (a) Describe all statistical methods, including those used to control for confounding                                                                                                                                                                                                                                                                                                                                                                                  | 5                  |
|                           |        | (b) Describe any methods used to examine subgroups and interactions                                                                                                                                                                                                                                                                                                                                                                                                    |                    |
|                           |        | (c) Explain how missing data were addressed                                                                                                                                                                                                                                                                                                                                                                                                                            |                    |
|                           |        | (d) <i>Cohort study</i> —If applicable, explain how loss to follow-up was addressed<br><i>Case-control study</i> —If applicable, explain how matching of cases and controls was addressed                                                                                                                                                                                                                                                                              |                    |

|                          |     |                                                                                                                                                                                                                                                                                                                                                                                                               |     |
|--------------------------|-----|---------------------------------------------------------------------------------------------------------------------------------------------------------------------------------------------------------------------------------------------------------------------------------------------------------------------------------------------------------------------------------------------------------------|-----|
|                          |     | <i>Cross-sectional study</i> —If applicable, describe analytical methods taking account of sampling strategy                                                                                                                                                                                                                                                                                                  |     |
|                          |     | (e) Describe any sensitivity analyses                                                                                                                                                                                                                                                                                                                                                                         |     |
| <b>Results</b>           |     |                                                                                                                                                                                                                                                                                                                                                                                                               |     |
| Participants             | 13* | (a) Report numbers of individuals at each stage of study—eg numbers potentially eligible, examined for eligibility, confirmed eligible, included in the study, completing follow-up, and analysed<br>(b) Give reasons for non-participation at each stage<br>(c) Consider use of a flow diagram                                                                                                               | 6   |
| Descriptive data         | 14* | (a) Give characteristics of study participants (eg demographic, clinical, social) and information on exposures and potential confounders<br>(b) Indicate number of participants with missing data for each variable of interest<br>(c) <i>Cohort study</i> —Summarise follow-up time (eg, average and total amount)                                                                                           |     |
| Outcome data             | 15* | <i>Cohort study</i> —Report numbers of outcome events or summary measures over time<br><i>Case-control study</i> —Report numbers in each exposure category, or summary measures of exposure<br><i>Cross-sectional study</i> —Report numbers of outcome events or summary measures                                                                                                                             | 6   |
| Main results             | 16  | (a) Give unadjusted estimates and, if applicable, confounder-adjusted estimates and their precision (eg, 95% confidence interval). Make clear which confounders were adjusted for and why they were included<br>(b) Report category boundaries when continuous variables were categorized<br>(c) If relevant, consider translating estimates of relative risk into absolute risk for a meaningful time period | 6-7 |
| Other analyses           | 17  | Report other analyses done—eg analyses of subgroups and interactions, and sensitivity analyses                                                                                                                                                                                                                                                                                                                | 6-7 |
| <b>Discussion</b>        |     |                                                                                                                                                                                                                                                                                                                                                                                                               |     |
| Key results              | 18  | Summarise key results with reference to study objectives                                                                                                                                                                                                                                                                                                                                                      | 7-9 |
| Limitations              | 19  | Discuss limitations of the study, taking into account sources of potential bias or imprecision. Discuss both direction and magnitude of any potential bias                                                                                                                                                                                                                                                    | 7-9 |
| Interpretation           | 20  | Give a cautious overall interpretation of results considering objectives, limitations, multiplicity of analyses, results from similar studies, and other relevant evidence                                                                                                                                                                                                                                    | 7-9 |
| Generalisability         | 21  | Discuss the generalisability (external validity) of the study results                                                                                                                                                                                                                                                                                                                                         | 7-9 |
| <b>Other information</b> |     |                                                                                                                                                                                                                                                                                                                                                                                                               |     |
| Funding                  | 22  | Give the source of funding and the role of the funders for the present study and, if applicable, for the original study on which the present article is based                                                                                                                                                                                                                                                 |     |

\*Give information separately for cases and controls in case-control studies and, if applicable, for exposed and unexposed groups in cohort and cross-sectional studies.

**Note:** An Explanation and Elaboration article discusses each checklist item and gives methodological background and published examples of transparent reporting. The STROBE checklist is best used in conjunction with this article (freely available on the Web sites of PLoS Medicine at <http://www.plosmedicine.org/>, Annals of Internal Medicine at <http://www.annals.org/>, and Epidemiology at <http://www.epidem.com/>). Information on the STROBE Initiative is available at [www.strobe-statement.org](http://www.strobe-statement.org).

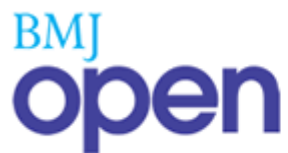

### Fate of manuscripts rejected by a non-English general medical journal

|                               |                                                                                                                                                                                                |
|-------------------------------|------------------------------------------------------------------------------------------------------------------------------------------------------------------------------------------------|
| Journal:                      | <i>BMJ Open</i>                                                                                                                                                                                |
| Manuscript ID:                | bmjopen-2011-000147.R1                                                                                                                                                                         |
| Article Type:                 | Research                                                                                                                                                                                       |
| Date Submitted by the Author: | 16-May-2011                                                                                                                                                                                    |
| Complete List of Authors:     | Vinther, Siri; Herlev Hospital, University of Copenhagen, Surgical Gastroenterology<br>Rosenberg, Jacob; Ugeskrift for Læger; Herlev Hospital, University of Copenhagen, Department of Surgery |
| <b>Subject Heading</b>:       | Journalology                                                                                                                                                                                   |
| Keywords:                     | MEDICAL JOURNALISM, MEDICAL ETHICS, BIOTECHNOLOGY & BIOINFORMATICS                                                                                                                             |
|                               |                                                                                                                                                                                                |

SCHOLARONE™  
Manuscripts

Peer Review Only

1  
2  
3  
4  
5  
6  
7  
8  
9  
10  
11  
12  
13  
14  
15  
16  
17  
18  
19  
20  
21  
22  
23  
24  
25  
26  
27  
28  
29  
30  
31  
32  
33  
34  
35  
36  
37  
38  
39  
40  
41  
42  
43  
44  
45  
46  
47  
48  
49  
50  
51  
52  
53  
54  
55  
56  
57  
58  
59  
60

**Fate of manuscripts rejected by a non-English general medical journal -  
a retrospective cohort study**

Siri Vinther, MS<sup>2</sup>

Jacob Rosenberg, MD, DSc<sup>1,2</sup>

1 Ugeskrift for Læger (Journal of the Danish Medical Association), Kristianiagade 12, 2100 Copenhagen,  
Denmark

2 Department of Surgical Gastroenterology, Herlev Hospital, University of Copenhagen, 2730 Herlev,  
Denmark

Correspondence regarding the manuscript to:

Siri Vinther

E-mail: sirivinther@hotmail.com

Word count: 1607

## Abstract

### Objective

The objective of this study was to determine whether, where and when manuscripts were published following rejection by the Journal of the Danish Medical Association - a general medical journal published in Danish. Similar previous studies have focused on specialty/subspecialty journals published in English.

### Design

Manuscripts rejected during a four-year period were searched for in PubMed and Embase in order to assess the percentage of manuscripts subsequently published in other journals. In addition, characteristics of both the published manuscripts and the journals they were published in were evaluated.

### Results

Of 198 rejected manuscripts, 21 (10.6%) were eventually published after a median of 685 days (range 209-1463). The majority of these were original research, published in English specialty/subspecialty journals. The median number of citations per article was 2-3 (interquartile range 0.5-9.5, depending of the database searched).

### Conclusions

10.6% of the rejected manuscripts were eventually published in other journals, mainly English specialty journals. This publication rate was considerable lower than previous studies. Manuscript translation could be a barrier for resubmitting to English journals with larger readerships, thus hindering the dissemination of knowledge to the international community.

## Article summary

### *Article focus*

- To determine whether, where and when manuscripts were published following rejection by a general medical journal published in another language than English

### *Key messages*

- 10.6% of the rejected manuscripts were eventually published in other journals; a publication rate **considerable lower than previous studies.**
- Manuscript translation could be a barrier for resubmitting to English journals with larger readerships. Scientific journals publishing in small languages should consider publishing original research in a major language like English in order to facilitate the dissemination of scientific results

### *Strengths and limitations of this study*

- PubMed and Embase were used to search for rejected manuscript eventually published in other (indexed) journals; previous studies have searched only PubMed for rejected manuscripts. However, even when searching both databases, the number of search results (published manuscripts) would most likely be an underestimate as some manuscripts could be published in non-indexed journals.
- This study deals with a general medical journal published in small language; previous studies have focused on speciality/subspeciality journals published in English.

This research received no specific grant from any funding agency in the public, commercial or not-for-profit sectors.

The authors have no relevant conflicts of interest regarding the present paper.

## Objective

Since 1839, the Journal of the Danish Medical Association (Ugeskrift for Læger - UfL) has been published on a weekly basis. It is one of the oldest general medical journals in the world – and the only Danish, peer-reviewed medical journal indexed in Medline.

The journal publishes editorials, original articles, systematic reviews, non-systematic reviews and case reports with an average of 10 articles per week.

UfL is published in Danish and thus serves a relatively small readership. Yet, the fate of manuscripts rejected by UfL is not only of national interest. This study could disclose that science communicated in a (small) national language may not cross borders. This could be of particular concern when no national alternative for manuscript resubmission exists. Then, language alone precludes the dissemination of knowledge that could otherwise benefit national as well as international scientific communities.

Previous studies about fate of rejected manuscripts have all dealt with speciality or subspeciality journals published in English (1-11). In these studies, more than half of the manuscripts initially rejected were eventually published in another journal.

The aim of this study was to establish whether the same may be applicable for a general medical journal published in another language than English.

## Methods

Manuscripts rejected during the years 2002-2005 were lent to the authors by the editorial office of UfL.

All unsolicited rejected manuscripts were included in the study, a total of 198. For each rejected manuscript, an enclosure provided information about date of submission, date of refusal, manuscript type, author(s), commentaries made by peer-reviewers. In addition, copies of editorial rejection letters were obtainable.

1  
2  
3  
4 PubMed and Embase were used to search for rejected manuscript eventually published in other (indexed)  
5  
6 journals. By default, only the first author's surname and initials were searched for. If the author had a very  
7  
8 common name, a combination of the first author's surname and the last author's surname was tried. If only  
9  
10 one author was listed, a combination of the author's surname and a subject keyword was tried.  
11  
12

13  
14  
15 When searching PubMed and Embase for manuscripts, the time interval was not restricted. In this way,  
16  
17 potential attempts at duplication could be detected (authors having submitted their manuscript to another  
18  
19 journal (and getting published) in addition to submitting to UfL). A non-restricted time interval would also  
20  
21 give a sufficient opportunity for a manuscript to be published elsewhere.  
22  
23

24  
25 When a search yielded a potential result in PubMed, Embase or both, the abstract was read. If any doubt  
26  
27 existed as to whether the publication corresponded to the manuscript once rejected by UfL, the article was  
28  
29 downloaded and read thoroughly. If doubt persisted, the corresponding author was contacted asking  
30  
31 whether this specific manuscript rejected by UfL had been published elsewhere.  
32  
33

34  
35 For each year (2002-2005) the number of submitted manuscripts, rejected manuscripts and manuscripts  
36  
37 subsequently published in (indexed) journals was counted. The proportion between rejected manuscripts  
38  
39 and total number of submissions and also the proportion between manuscripts published elsewhere and  
40  
41 rejected manuscripts were then calculated. Finally, the distribution of the manuscript types submitted to UfL  
42  
43 and the distribution of the manuscript types published elsewhere were analysed.  
44  
45

46  
47  
48 For every published manuscript, the following was recorded: manuscript type (original research, systematic  
49  
50 review, non-systematic review, case report), **reason for rejection by UfL** and finally the number of citations  
51  
52 in Web of Science, **Scopus** and Google Scholar (12-15).  
53  
54

55  
56 For every publishing journal, the name, subject, publication language and impact factor were recorded. **17**  
57  
58 **journals were rated for impact by the Institute for Scientific Information (16).**  
59  
60



## Results

Table 1 shows the number of submitted manuscripts to UfL, the number of rejected manuscripts, the proportion between rejected manuscripts and submissions, the number of manuscripts published elsewhere and the proportion between manuscripts published elsewhere and manuscripts rejected by UfL. A total of 198 manuscripts were rejected during the years 2002-2005; the average acceptance rate was 91.8%. Of the manuscripts rejected by UfL, 21 were subsequently published elsewhere.

Based on the editorial rejections letters, 2/3 of the eventually published manuscripts were rejected by UfL because of methodological/scientific reasons. For the rest, the reasons were lack of originality and/or clinical interest.

Table 2 shows characteristics of the 19 journals that eventually published the 21 manuscripts. All of the articles were published in English. With regard to subject, the majority of journals would be categorized as specialty/subspecialty journals.

The median time from submission to UfL to publication elsewhere was 685 days (range 209-1463). Six manuscripts were published within one year of the original submission to UfL, six manuscripts were published within two years and nine manuscripts were published more than two years after the submission to UfL.

Figure 1a shows the relative distribution of submitted manuscripts (2440 in total). Figure 1b shows the relative distribution of the rejected manuscripts eventually published elsewhere (21 in total).

Table 3 shows data for the manuscripts of original research. Overall, 26.8% of the manuscripts submitted to UfL were manuscripts of original research. Of all the manuscripts rejected by UfL, manuscripts of original research constituted 36.9%. Of all published manuscripts initially rejected by UfL, manuscripts of original research constituted 38.1%. The proportion between published manuscripts of original research and manuscripts of original research rejected by UfL was 11.0%.

1  
2  
3  
4  
5  
6  
7 As a measure of importance, the number of citations that each article received since its publication was also  
8 studied. As the number of citations can differ significantly depending on the database searched, it was  
9 considered relevant to search both Web of Science, Scopus and Google Scholar (12-14).  
10  
11 For Web of Science, the median number of citations was 2; the inter-quartile range was 0.5-6. The total  
12 number of citations was 104. For Scopus, the median number of citations was 2; the inter-quartile range  
13 was 0.5-5.5. The total number of citations was 109. For Google Scholar, the median number of citation was  
14 3; the inter-quartile range was 1.5-9.5. The total number of citations was 153. Only two manuscripts have  
15 received more than 10 citations in all three databases.  
16  
17  
18  
19  
20  
21  
22  
23  
24

## 25 Discussion

26  
27  
28  
29 This study found that 10.6% of the manuscripts rejected by a non-English general medical journal were  
30 subsequently published in other journals. The majority of these manuscripts were published in  
31 specialty/subspecialty journals. The publication rate of 10.6% differs notably from publication rates found in  
32 previous studies (1-11).  
33  
34  
35  
36  
37  
38

39 The majority of manuscripts submitted to UfL between 2002 and 2005 were non-systematic reviews. Most of  
40 these manuscripts were probably never resubmitted, at least not to international journals. Methodological  
41 inadequacies, lack of originality or focus on local issues could be reasons for rejecting such manuscripts - if  
42 they were to be resubmitted.  
43  
44  
45  
46  
47

48 Manuscripts of original research were most often published (c.f. figure 1b and table 3). Authors of original  
49 research manuscripts might be more persistent and intent on getting published; the process of translating  
50 and resubmitting might not be a barrier for authors who already put a lot of efforts into the research  
51 process. For editors, there is an ethical responsibility to publish manuscripts of original research, not least  
52 when the findings are of interest to an international audience.  
53  
54  
55  
56  
57  
58  
59  
60

1  
2  
3  
4 Previous studies have dealt with specialty or subspecialty journals for which reason it has been more obvious  
5  
6 to compare impact factors (between journals within the same field). Overall, it seems that publication is  
7  
8 attempted first in a journal with a relatively high impact factor. If the manuscript is rejected, it is then  
9  
10 submitted to a journal with higher acceptance rate and lower (or no) impact factor, e.g. to national journals  
11  
12 publishing in non-English like UfL. If the manuscript is rejected again, there are not many places left to go.

13  
14  
15 In theory, this could explain some of the discrepancies between the findings of this study and those of  
16  
17 previous studies (all dealing with high impact journals with low acceptance rates).

18  
19  
20  
21 Previous studies have searched only PubMed for rejected manuscripts. This involves a risk of missing  
22  
23 manuscripts published in journals not indexed in this database. When searching for medical literature,  
24  
25 Embase is generally regarded an important supplement to PubMed, especially when it comes to European  
26  
27 literature (17-20). Searching both PubMed and Embase was important in the present study as two additional  
28  
29 manuscripts were retrieved by searching Embase. However, even when searching both databases, the  
30  
31 number of search results (published manuscripts) would most likely be an underestimate as some  
32  
33 manuscripts could be published in non-indexed journals – a major limitation to this study.

34  
35 Another limitation of the study was the potential risk of not identifying all indexed articles. When searching  
36  
37 PubMed and Embase, the first author's surname and initials were initially tried. If an author had a very  
38  
39 common name – or a long list of publications – a combination with either the last author's name or a subject  
40  
41 keyword was tried. This approach should limit the number of overlooked manuscripts; yet, spelling  
42  
43 differences and/or changes in the number or order of authors could lead to an underestimation of the  
44  
45 number of manuscripts published in indexed journals.

46  
47  
48  
49 This study differs significantly from previous studies because it deals with a general medical journal  
50  
51 published in small language (Danish is spoken by only 0.08% of the world population (21;22)). Previous  
52  
53 studies have focused on specialty/subspecialty journals published in English. It seems like a reasonable  
54  
55 assumption that language, including translation of manuscripts, could be a potential barrier for resubmission  
56  
57 to other journals.  
58  
59  
60

1  
2  
3  
4 In a broader perspective, this implies that scientific results initially communicated in a small language have  
5 international reach only in rare instances. Scientific journals publishing in small languages should  
6 acknowledge this problem and consider possible solutions. Since 2009, UfL has published all original articles  
7 in English in the open-access journal Danish Medical Bulletin (23;24). Whether a mono- or bilingual  
8 approach is chosen, the aim should be to facilitate the communication of science.  
9  
10  
11  
12  
13  
14  
15  
16  
17  
18  
19  
20  
21  
22  
23  
24  
25  
26  
27  
28  
29  
30  
31  
32  
33  
34  
35  
36  
37  
38  
39  
40  
41  
42  
43  
44  
45  
46  
47  
48  
49  
50  
51  
52  
53  
54  
55  
56  
57  
58  
59  
60

For peer review only

## Author contributions

SV and JR made substantial contributions to conception and design, SV was responsible for acquisition of data and initial analysis, SV and JR participated in the interpretation of data; SV drafted the article, and SV and JR revised it critically for important intellectual content; SV and JR gave final approval of the version to be published.

SV had full access to all of the data in the study and takes responsibility for the integrity of the data and the accuracy of the data analysis.

For peer review only

## Reference List

- 1  
2  
3  
4  
5  
6  
7 (1) Wijnhoven BP, Dejong CH. Fate of manuscripts declined by the British Journal of Surgery. *Br J Surg* 2010 Mar;97(3):450-4.
- 8  
9  
10 (2) Liesegang TJ, Shaikh M, Crook JE. The outcome of manuscripts submitted to the American Journal  
11 of Ophthalmology between 2002 and 2003. *Am J Ophthalmol* 2007 Apr;143(4):551-60.
- 12  
13 (3) Silberzweig JE, Khorsandi AS. Outcomes of rejected Journal of Vascular and Interventional Radiology  
14 manuscripts. *J Vasc Interv Radiol* 2008 Nov;19(11):1620-3.
- 15  
16 (4) Dewan P, Gupta P, Shah D. Fate of articles rejected by Indian Pediatrics. *Indian Pediatr* 2010  
17 Dec;47(12):1031-5.
- 18  
19 (5) Chew FS. Fate of manuscripts rejected for publication in the AJR. *AJR Am J Roentgenol* 1991  
20 Mar;156(3):627-32.
- 21  
22 (6) Armstrong AW, Idriss SZ, Kimball AB, Bernhard JD. Fate of manuscripts declined by the Journal of  
23 the American Academy of Dermatology. *J Am Acad Dermatol* 2008 Apr;58(4):632-5.
- 24  
25 (7) Ray J, Berkwits M, Davidoff F. The fate of manuscripts rejected by a general medical journal. *Am J*  
26 *Med* 2000 Aug 1;109(2):131-5.
- 27  
28 (8) McDonald RJ, Cloft HJ, Kallmes DF. Fate of submitted manuscripts rejected from the American  
29 Journal of Neuroradiology: outcomes and commentary. *AJNR Am J Neuroradiol* 2007  
30 Sep;28(8):1430-4.
- 31  
32 (9) McDonald RJ, Cloft HJ, Kallmes DF. Fate of manuscripts previously rejected by the American Journal  
33 of Neuroradiology: a follow-up analysis. *AJNR Am J Neuroradiol* 2009 Feb;30(2):253-6.
- 34  
35 (10) Nemery B. What happens to the manuscripts that have not been accepted for publication in  
36 Occupational and Environmental Medicine? *Occup Environ Med* 2001 Sep;58(9):604-7.
- 37  
38 (11) Hall SA, Wilcox AJ. The fate of epidemiologic manuscripts: a study of papers submitted to  
39 epidemiology. *Epidemiology* 2007 Mar;18(2):262-5.
- 40  
41 (12) Elsevier. SciVerse Scopus. [http://www info sciverse com/scopus](http://www.info.sciverse.com/scopus) 2011 May 5
- 42  
43 (13) Google. Google Scholar. [http://scholar google dk/](http://scholar.google.dk/) 2011 March 14
- 44  
45 (14) ISI Web of Knowledge. Web of Science. [http://apps isiknowledge com ep fjernadgang kb dk/WOS\\_GeneralSearch\\_input do?product=WOS&search\\_mode=GeneralSearch&SID=R2pIPf75MpOIaOmolC@&preferencesSaved=2011](http://apps.isiknowledge.com/epfjernadgang.kb.dk/WOS_GeneralSearch_input.do?product=WOS&search_mode=GeneralSearch&SID=R2pIPf75MpOIaOmolC@&preferencesSaved=2011)
- 46  
47  
48  
49  
50  
51 (15) Kulkarni AV, Aziz B, Shams I, Busse JW. Comparisons of Citations in Web of Science, Scopus, and  
52 Google Scholar for Articles Published in General Medical Journals. *Jama-Journal of the American*  
53 *Medical Association* 2009;302(10):1092-6.
- 54  
55 (16) ISI Web of Knowledge. Journal Citation Reports. [http://admin-apps isiknowledge com ep fjernadgang kb dk/JCR/JCR?PointOfEntry=Home&SID=N115PeIPck2NBnb88i3](http://admin-apps.isiknowledge.com/epfjernadgang.kb.dk/JCR/JCR?PointOfEntry=Home&SID=N115PeIPck2NBnb88i3) 2011 March 14
- 56  
57  
58 (17) Fangerau H. Finding European bioethical literature: an evaluation of the leading abstracting and  
59 indexing services. *J Med Ethics* 2004 Jun;30(3):299-303.
- 60

- 1  
2  
3  
4 (18) Wilkins T, Gillies RA, Davies K. EMBASE versus MEDLINE for family medicine searches: can MEDLINE  
5 searches find the forest or a tree? Can Fam Physician 2005 Jun;51:848-9.  
6  
7  
8 (19) Kelly L, St Pierre-Hansen N. So many databases, such little clarity: Searching the literature for the  
9 topic aboriginal. Can Fam Physician 2008 Nov;54(11):1572-3.  
10  
11 (20) Woods D, Trewheellar K. Medline and Embase complement each other in literature searches. BMJ  
12 1998 Apr 11;316(7138):1166.  
13  
14 (21) Wikipedia. Languages by number of native speakers. [http://en](http://en.wikipedia.org/wiki/List_of_languages_by_number_of_native_speakers) wikipedia  
15 org/wiki/List\_of\_languages\_by\_number\_of\_native\_speakers 2011 May 5  
16  
17 (22) Wikipedia. World population. [http://en](http://en.wikipedia.org/wiki/World_population) wikipedia org/wiki/World\_population 2011 May 5  
18  
19 (23) Rosenberg J. [Danish versus English in Ugeskrift for Laeger]. Ugeskr Laeger 2009 Jun  
20 1;171(23):1911.  
21  
22 (24) Danish Medical Bulletin. Danish Medical Bulletin. www danmedbul dk 2011  
23  
24 (25) [www.ulrichsweb.com](http://www.ulrichsweb.com). Global series directory. [http://www](http://www.ulrichsweb.com/ep/fjernadgang/kb/dk/ulrichsweb/Search/fullCitation.asp?navPage=1&tab=1&serial_uid=18616&issn=00415782)  
25 ulrichsweb com ep fjernadgang kb  
26 dk/ulrichsweb/Search/fullCitation asp?navPage=1&tab=1&serial\_uid=18616&issn=00415782 2011  
27 March 14  
28  
29  
30  
31  
32  
33  
34  
35  
36  
37  
38  
39  
40  
41  
42  
43  
44  
45  
46  
47  
48  
49  
50  
51  
52  
53  
54  
55  
56  
57  
58  
59  
60

1  
2  
3  
4  
5  
6  
7  
8  
9  
10  
11  
12  
13  
14  
15  
16  
17  
18  
19  
20  
21  
22  
23  
24  
25  
26  
27  
28  
29  
30  
31  
32  
33  
34  
35  
36  
37  
38  
39  
40  
41  
42  
43  
44  
45  
46  
47  
48  
49  
50  
51  
52  
53  
54  
55  
56  
57  
58  
59  
60

Table 1: Manuscripts – submitted, rejected and published elsewhere

| <i>Year</i> | <i>Submitted manuscripts</i> | <i>Rejected manuscripts</i> | <i>Rejected manuscripts (% of submissions)</i> | <i>Manuscripts subsequently published elsewhere</i> | <i>Published elsewhere (% of rejected manuscripts)</i> |
|-------------|------------------------------|-----------------------------|------------------------------------------------|-----------------------------------------------------|--------------------------------------------------------|
| 2002        | 555                          | 58                          | 10.5                                           | 7                                                   | 12.1                                                   |
| 2003        | 707                          | 51                          | 7.2                                            | 8                                                   | 15.7                                                   |
| 2004        | 585                          | 52                          | 8.9                                            | 4                                                   | 7.7                                                    |
| 2005        | 593                          | 37                          | 6.2                                            | 2                                                   | 5.4                                                    |
| Total       | 2440                         | 198                         | 8.1                                            | 21                                                  | 10.6                                                   |

For peer review only



Table 2: Characteristics of the publishing journals

| <i>Journal</i>                                            | <i>Year of publication</i> | <i>Impact factor*</i> | <i>Subject of journal (25)</i>                                                     | <i>Language of journal</i> |
|-----------------------------------------------------------|----------------------------|-----------------------|------------------------------------------------------------------------------------|----------------------------|
| Acta Radiologica                                          | 2006                       | 0.884                 | Radiology and nuclear medicine                                                     | English                    |
| Acupuncture in Medicine                                   | 2002                       |                       | Alternative medicine                                                               | English                    |
| American journal of cancer (ceased)                       | 2004                       |                       | Oncology                                                                           | English                    |
| American journal of case reports                          | 2008                       |                       | Medical sciences                                                                   | English                    |
| Archives of gynecology and obstetrics                     | 2006                       | 0.666 (2007)          | Obstetrics and gynecology                                                          | English                    |
| Basic and clinical pharmacology & toxicology**            | 2003+<br>2004              | 1.489 (2005)          | Pharmacy, pharmacology; environmental studies, toxicology and environmental safety | English                    |
| Clinical rheumatology                                     | 2008                       | 1.559                 | Rheumatology                                                                       | English                    |
| Current medical research and opinion                      | 2006                       | 3.062                 | Medical sciences                                                                   | English                    |
| Homeopathy                                                | 2006                       | 1.041 (2008)          | Chiropractic, homeopathy, osteopathy                                               | English                    |
| International journal for quality in health care          | 2004                       | 1.138 (2005)          | Medical sciences                                                                   | English                    |
| International Journal of Hygiene and Environmental Health | 2007                       | 1.621                 | Public health and safety                                                           | English                    |
| International urology and nephrology                      | 2007                       | 0.482                 | Urology and nephrology                                                             | English                    |
| Journal of clinical densitometry                          | 2005                       | 1.871                 | Medical sciences                                                                   | English                    |
| Medical hypotheses                                        | 2005                       | 0.92                  | Medical sciences                                                                   | English                    |
| International Journal of Clinical Pharmacy***             | 2006                       | 0.941                 | Pharmacy and pharmacology                                                          | English                    |
| Scandinavian journal of infectious diseases               | 2003                       | 1.308 (2005)          | Communicable diseases                                                              | English                    |
| Scandinavian journal of primary health care               | 2006                       | 1.541                 | Nurses and nursing; health facilities and administration                           | English                    |
| Surgical laparoscopy endoscopy & percutaneous techniques  | 2005                       | 0.865                 | Surgery; gastroenterology; obstetrics and gynecology                               | English                    |
| Vaccine                                                   | 2004                       | 2.822 (2005)          | Allergology and immunology; veterinary science                                     | English                    |

\* IF from the year the manuscript was published. If the journal was not yet rated for impact, the "oldest" IF was recorded (year in brackets).

\*\*formerly Pharmacology and Toxicology; \*\*\*formerly Pharmacy world and science

1  
2  
3  
4  
5  
6  
7  
8  
9  
10  
11  
12  
13  
14  
15  
16  
17  
18  
19  
20  
21  
22  
23  
24  
25  
26  
27  
28  
29  
30  
31  
32  
33  
34  
35  
36  
37  
38  
39  
40  
41  
42  
43  
44  
45  
46  
47  
48  
49  
50  
51  
52  
53  
54  
55  
56  
57  
58  
59  
60

Figure 1a: Submitted manuscripts - relative distribution

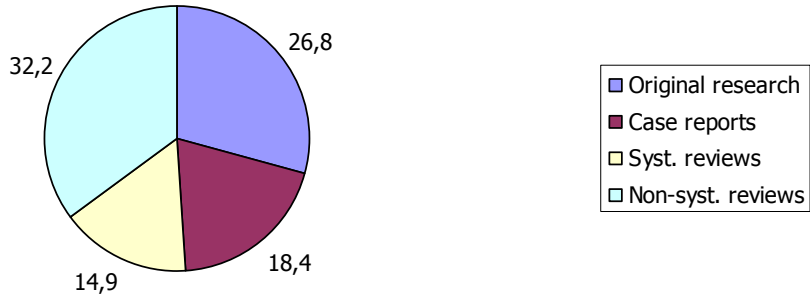

Figure 1b: Rejected manuscripts published elsewhere - relative distribution

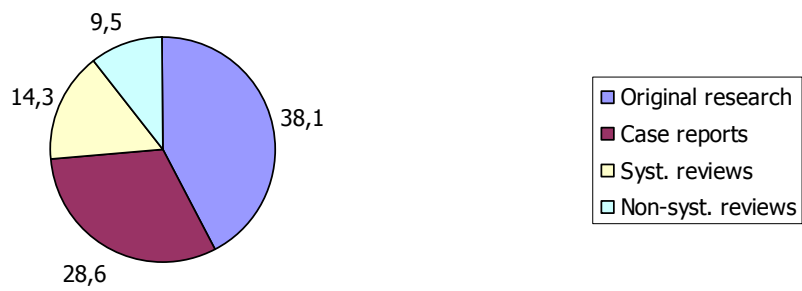

Table 3: Manuscripts of original research

| Year  | Submitted original manuscripts out of total number of submitted manuscripts (%) | Rejected original manuscripts out of total number of rejected manuscripts (%) | Published original manuscripts out of total number of published manuscripts (%) | Published original manuscripts out of rejected original manuscripts (%) |
|-------|---------------------------------------------------------------------------------|-------------------------------------------------------------------------------|---------------------------------------------------------------------------------|-------------------------------------------------------------------------|
| 2002  | 30,1                                                                            | 32,8                                                                          | 14,3                                                                            | 5,3                                                                     |
| 2003  | 27,0                                                                            | 45,1                                                                          | 37,5                                                                            | 13,0                                                                    |
| 2004  | 24,8                                                                            | 40,4                                                                          | 75,0                                                                            | 14,5                                                                    |
| 2005  | 25,5                                                                            | 27,0                                                                          | 50,0                                                                            | 10,0                                                                    |
| Total | <b>26,8</b>                                                                     | <b>36,9</b>                                                                   | <b>38,1</b>                                                                     | <b>11,0</b>                                                             |

For peer review only

**STROBE 2007 (v4) checklist of items to be included in reports of observational studies in epidemiology\***  
**Checklist for cohort, case-control, and cross-sectional studies (combined)**

| Section/Topic             | Item # | Recommendation                                                                                                                                                                                                                                                                                                                                                                                                                                                         | Reported on page # |
|---------------------------|--------|------------------------------------------------------------------------------------------------------------------------------------------------------------------------------------------------------------------------------------------------------------------------------------------------------------------------------------------------------------------------------------------------------------------------------------------------------------------------|--------------------|
| Title and abstract        | 1      | (a) Indicate the study's design with a commonly used term in the title or the abstract                                                                                                                                                                                                                                                                                                                                                                                 | 1                  |
|                           |        | (b) Provide in the abstract an informative and balanced summary of what was done and what was found                                                                                                                                                                                                                                                                                                                                                                    | 2                  |
| <b>Introduction</b>       |        |                                                                                                                                                                                                                                                                                                                                                                                                                                                                        |                    |
| Background/rationale      | 2      | Explain the scientific background and rationale for the investigation being reported                                                                                                                                                                                                                                                                                                                                                                                   | 4                  |
| Objectives                | 3      | State specific objectives, including any pre-specified hypotheses                                                                                                                                                                                                                                                                                                                                                                                                      | 4                  |
| <b>Methods</b>            |        |                                                                                                                                                                                                                                                                                                                                                                                                                                                                        |                    |
| Study design              | 4      | Present key elements of study design early in the paper                                                                                                                                                                                                                                                                                                                                                                                                                | 4-5                |
| Setting                   | 5      | Describe the setting, locations, and relevant dates, including periods of recruitment, exposure, follow-up, and data collection                                                                                                                                                                                                                                                                                                                                        |                    |
| Participants              | 6      | (a) <i>Cohort study</i> —Give the eligibility criteria, and the sources and methods of selection of participants. Describe methods of follow-up<br><i>Case-control study</i> —Give the eligibility criteria, and the sources and methods of case ascertainment and control selection. Give the rationale for the choice of cases and controls<br><i>Cross-sectional study</i> —Give the eligibility criteria, and the sources and methods of selection of participants | 4-5                |
|                           |        | (b) <i>Cohort study</i> —For matched studies, give matching criteria and number of exposed and unexposed<br><i>Case-control study</i> —For matched studies, give matching criteria and the number of controls per case                                                                                                                                                                                                                                                 |                    |
| Variables                 | 7      | Clearly define all outcomes, exposures, predictors, potential confounders, and effect modifiers. Give diagnostic criteria, if applicable                                                                                                                                                                                                                                                                                                                               | 5                  |
| Data sources/ measurement | 8*     | For each variable of interest, give sources of data and details of methods of assessment (measurement). Describe comparability of assessment methods if there is more than one group                                                                                                                                                                                                                                                                                   |                    |
| Bias                      | 9      | Describe any efforts to address potential sources of bias                                                                                                                                                                                                                                                                                                                                                                                                              |                    |
| Study size                | 10     | Explain how the study size was arrived at                                                                                                                                                                                                                                                                                                                                                                                                                              |                    |
| Quantitative variables    | 11     | Explain how quantitative variables were handled in the analyses. If applicable, describe which groupings were chosen and why                                                                                                                                                                                                                                                                                                                                           |                    |
| Statistical methods       | 12     | (a) Describe all statistical methods, including those used to control for confounding                                                                                                                                                                                                                                                                                                                                                                                  | 5                  |
|                           |        | (b) Describe any methods used to examine subgroups and interactions                                                                                                                                                                                                                                                                                                                                                                                                    |                    |
|                           |        | (c) Explain how missing data were addressed                                                                                                                                                                                                                                                                                                                                                                                                                            |                    |
|                           |        | (d) <i>Cohort study</i> —If applicable, explain how loss to follow-up was addressed<br><i>Case-control study</i> —If applicable, explain how matching of cases and controls was addressed                                                                                                                                                                                                                                                                              |                    |

|                          |     |                                                                                                                                                                                                                                                                                                                                                                                                               |     |
|--------------------------|-----|---------------------------------------------------------------------------------------------------------------------------------------------------------------------------------------------------------------------------------------------------------------------------------------------------------------------------------------------------------------------------------------------------------------|-----|
|                          |     | <i>Cross-sectional study</i> —If applicable, describe analytical methods taking account of sampling strategy                                                                                                                                                                                                                                                                                                  |     |
|                          |     | (e) Describe any sensitivity analyses                                                                                                                                                                                                                                                                                                                                                                         |     |
| <b>Results</b>           |     |                                                                                                                                                                                                                                                                                                                                                                                                               |     |
| Participants             | 13* | (a) Report numbers of individuals at each stage of study—eg numbers potentially eligible, examined for eligibility, confirmed eligible, included in the study, completing follow-up, and analysed<br>(b) Give reasons for non-participation at each stage<br>(c) Consider use of a flow diagram                                                                                                               | 6   |
| Descriptive data         | 14* | (a) Give characteristics of study participants (eg demographic, clinical, social) and information on exposures and potential confounders<br>(b) Indicate number of participants with missing data for each variable of interest<br>(c) <i>Cohort study</i> —Summarise follow-up time (eg, average and total amount)                                                                                           |     |
| Outcome data             | 15* | <i>Cohort study</i> —Report numbers of outcome events or summary measures over time<br><i>Case-control study</i> —Report numbers in each exposure category, or summary measures of exposure<br><i>Cross-sectional study</i> —Report numbers of outcome events or summary measures                                                                                                                             | 6   |
| Main results             | 16  | (a) Give unadjusted estimates and, if applicable, confounder-adjusted estimates and their precision (eg, 95% confidence interval). Make clear which confounders were adjusted for and why they were included<br>(b) Report category boundaries when continuous variables were categorized<br>(c) If relevant, consider translating estimates of relative risk into absolute risk for a meaningful time period | 6-7 |
| Other analyses           | 17  | Report other analyses done—eg analyses of subgroups and interactions, and sensitivity analyses                                                                                                                                                                                                                                                                                                                | 6-7 |
| <b>Discussion</b>        |     |                                                                                                                                                                                                                                                                                                                                                                                                               |     |
| Key results              | 18  | Summarise key results with reference to study objectives                                                                                                                                                                                                                                                                                                                                                      | 7-9 |
| Limitations              | 19  | Discuss limitations of the study, taking into account sources of potential bias or imprecision. Discuss both direction and magnitude of any potential bias                                                                                                                                                                                                                                                    | 7-9 |
| Interpretation           | 20  | Give a cautious overall interpretation of results considering objectives, limitations, multiplicity of analyses, results from similar studies, and other relevant evidence                                                                                                                                                                                                                                    | 7-9 |
| Generalisability         | 21  | Discuss the generalisability (external validity) of the study results                                                                                                                                                                                                                                                                                                                                         | 7-9 |
| <b>Other information</b> |     |                                                                                                                                                                                                                                                                                                                                                                                                               |     |
| Funding                  | 22  | Give the source of funding and the role of the funders for the present study and, if applicable, for the original study on which the present article is based                                                                                                                                                                                                                                                 |     |

\*Give information separately for cases and controls in case-control studies and, if applicable, for exposed and unexposed groups in cohort and cross-sectional studies.

**Note:** An Explanation and Elaboration article discusses each checklist item and gives methodological background and published examples of transparent reporting. The STROBE checklist is best used in conjunction with this article (freely available on the Web sites of PLoS Medicine at <http://www.plosmedicine.org/>, Annals of Internal Medicine at <http://www.annals.org/>, and Epidemiology at <http://www.epidem.com/>). Information on the STROBE Initiative is available at [www.strobe-statement.org](http://www.strobe-statement.org).

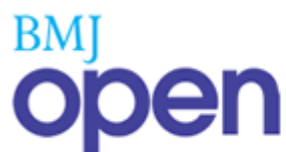

**Fate of manuscripts rejected by a non-English-language  
general medical journal -  
a retrospective cohort study**

|                               |                                                                                                                                                                                                |
|-------------------------------|------------------------------------------------------------------------------------------------------------------------------------------------------------------------------------------------|
| Journal:                      | <i>BMJ Open</i>                                                                                                                                                                                |
| Manuscript ID:                | bmjopen-2011-000147.R2                                                                                                                                                                         |
| Article Type:                 | Research                                                                                                                                                                                       |
| Date Submitted by the Author: | 27-May-2011                                                                                                                                                                                    |
| Complete List of Authors:     | Vinther, Siri; Herlev Hospital, University of Copenhagen, Surgical Gastroenterology<br>Rosenberg, Jacob; Ugeskrift for Læger; Herlev Hospital, University of Copenhagen, Department of Surgery |
| <b>Subject Heading</b>:       | Journalology                                                                                                                                                                                   |
| Keywords:                     | MEDICAL JOURNALISM, MEDICAL ETHICS, BIOTECHNOLOGY & BIOINFORMATICS                                                                                                                             |
|                               |                                                                                                                                                                                                |

SCHOLARONE™  
Manuscripts

only

1  
2  
3  
4  
5  
6  
7  
8  
9  
10  
11  
12  
13  
14  
15  
16  
17  
18  
19  
20  
21  
22  
23  
24  
25  
26  
27  
28  
29  
30  
31  
32  
33  
34  
35  
36  
37  
38  
39  
40  
41  
42  
43  
44  
45  
46  
47  
48  
49  
50  
51  
52  
53  
54  
55  
56  
57  
58  
59  
60

**Fate of manuscripts rejected by a non-English-language general medical journal -  
a retrospective cohort study**

Siri Vinther, MS<sup>2</sup>

Jacob Rosenberg, MD, DSc<sup>1,2</sup>

1 Ugeskrift for Læger (Journal of the Danish Medical Association), Kristianiagade 12, 2100 Copenhagen,  
Denmark

2 Department of Surgical Gastroenterology, Herlev Hospital, University of Copenhagen, 2730 Herlev,  
Denmark

Correspondence regarding the manuscript to:

Siri Vinther

E-mail: sirivinther@hotmail.com

Word count: 1574

## Abstract

### Objective

The objective of this study was to determine whether, where and when manuscripts were published following rejection by the Journal of the Danish Medical Association - a general medical journal published in Danish. Similar previous studies have focused on specialty/subspecialty journals published in English.

### Design

Manuscripts rejected during a four-year period were searched for in PubMed and Embase in order to assess the percentage of manuscripts subsequently published in other journals. In addition, characteristics of both the published manuscripts and the journals they were published in were evaluated.

### Results

Of 198 rejected manuscripts, 21 (10.6%) were eventually published after a median of 685 days (range 209-1463). The majority of these were original research, published in English-language specialty/subspecialty journals.

The median number of citations per article was 2-3 (interquartile range 0.5-9.5, depending of the database searched).

### Conclusions

10.6% of the rejected manuscripts were eventually published in other journals, mainly English-language specialty journals. This proportion was considerably lower than that for other journals that have studied the fate of rejected manuscripts. Manuscript translation could be a barrier for resubmitting to English-language journals with larger readerships, thus hindering the dissemination of knowledge to the international community.



## Article summary

### *Article focus*

- To determine whether, where and when manuscripts were published following rejection by a general medical journal published in another language than English

### *Key messages*

- 10.6% of the rejected manuscripts were eventually published in other journals, a proportion considerably lower than that for other journals that have studied the fate of rejected manuscripts
- Manuscript translation could be a barrier for resubmitting to English-language journals with larger readerships. Scientific journals publishing in small languages should consider publishing original research in a major language like English in order to facilitate the dissemination of scientific results

### *Strengths and limitations of this study*

- PubMed and Embase were used to search for rejected manuscript eventually published in other (indexed) journals; previous studies have searched only PubMed for rejected manuscripts. However, even when searching both databases, the number of search results (published manuscripts) would most likely be an underestimate as some manuscripts could be published in non-indexed journals.
- This study deals with a general medical journal published in small language; previous studies have focused on speciality/subspeciality journals published in English.

This research received no specific grant from any funding agency in the public, commercial or not-for-profit sectors.

The authors have no relevant conflicts of interest regarding the present paper.

## Objective

Since 1839, the Journal of the Danish Medical Association (Ugeskrift for Læger - UfL) has been published on a weekly basis. It is one of the oldest general medical journals in the world – and the only Danish, peer-reviewed medical journal indexed in Medline.

The journal publishes editorials, original articles, systematic reviews, non-systematic reviews and case reports with an average of 10 articles per week.

The objective of this study was to determine whether, where and when manuscripts were published following rejection by UfL. The journal is published in Danish and thus serves a relatively small readership. Yet, the fate of manuscripts rejected by UfL is not only of national interest. This study could disclose that science communicated in a (small) national language may not cross borders. This could be of particular concern when no national alternative for manuscript resubmission exists. Then, language alone precludes the dissemination of knowledge that could otherwise benefit national as well as international scientific communities.

## Methods

The editorial office of UfL kindly gave access to all manuscripts rejected by the journal. All unsolicited manuscripts rejected during the years 2002-2005 were included in the study, a total of 198. For each rejected manuscript, an enclosure provided information about date of submission, date of refusal, manuscript type, author(s), commentaries made by peer-reviewers. In addition, copies of editorial rejection letters were obtainable.

PubMed and Embase were used to search for rejected manuscript eventually published in other (indexed) journals. By default, only the first author's surname and initials were searched for. If the author had a very common name, a combination of the first author's surname and the last author's surname was tried. If only one author was listed, a combination of the author's surname and a subject keyword was tried.

1  
2  
3  
4  
5  
6  
7 When searching PubMed and Embase for manuscripts, the time interval was not restricted. In this way,  
8 potential attempts at duplication could be detected (authors having submitted their manuscript to another  
9 journal (and getting published) in addition to submitting to UfL). A non-restricted time interval would also  
10 give a sufficient opportunity for a manuscript to be published elsewhere.  
11  
12  
13  
14

15  
16  
17 When a search yielded a potential result in PubMed, Embase or both, the abstract was read. If any doubt  
18 existed as to whether the publication corresponded to the manuscript once rejected by UfL, the article was  
19 downloaded and read thoroughly. If doubt persisted, the corresponding author was contacted asking  
20 whether this specific manuscript rejected by UfL had been published elsewhere.  
21  
22  
23  
24

25  
26  
27 For each year (2002-2005) the number of submitted manuscripts, rejected manuscripts and manuscripts  
28 subsequently published in (indexed) journals was counted. The proportion between rejected manuscripts  
29 and total number of submissions and also the proportion between manuscripts published elsewhere and  
30 rejected manuscripts were then calculated. Finally, the distribution of the manuscript types submitted to UfL  
31 and the distribution of the manuscript types published elsewhere were analysed.  
32  
33  
34  
35  
36  
37

38  
39 For every published manuscript, the following was recorded: manuscript type (original research, systematic  
40 review, non-systematic review, case report), reason for rejection by UfL and finally the number of citations  
41 in Web of Science, Scopus and Google Scholar (1-4).  
42  
43  
44  
45  
46  
47

48 For every publishing journal, the name, subject, publication language and impact factor were recorded. 17  
49 journals were rated for impact by the Institute for Scientific Information (5).  
50  
51  
52

## 53 **Results**

54  
55  
56  
57  
58 Table 1 shows the number of submitted manuscripts to UfL, the number of rejected manuscripts, the  
59 proportion between rejected manuscripts and submissions, the number of manuscripts published elsewhere  
60

1  
2  
3  
4 and the proportion between manuscripts published elsewhere and manuscripts rejected by UfL. A total of  
5  
6 198 manuscripts were rejected during the years 2002-2005; the average acceptance rate was 91.8%. Of the  
7  
8 manuscripts rejected by UfL, 21 were subsequently published elsewhere.  
9

10  
11  
12 Based on the editorial rejections letters, 2/3 of the eventually published manuscripts were rejected by UfL  
13  
14 because of methodological/scientific reasons. For the rest, the reasons were lack of originality and/or clinical  
15  
16 interest.  
17

18  
19  
20 Table 2 shows characteristics of the 19 journals that eventually published the 21 manuscripts. All of the  
21  
22 articles were published in English. With regard to subject, the majority of journals would be categorized as  
23  
24 specialty/subspecialty journals.  
25  
26

27  
28  
29 The median time from submission to UfL to publication elsewhere was 685 days (range 209-1463). Six  
30  
31 manuscripts were published within one year of the original submission to UfL, six manuscripts were  
32  
33 published within two years and nine manuscripts were published more than two years after the submission  
34  
35 to UfL.  
36  
37

38  
39  
40 Figure 1a shows the relative distribution of submitted manuscripts (2440 in total). Figure 1b shows the  
41  
42 relative distribution of the rejected manuscripts eventually published elsewhere (21 in total).  
43

44 Table 3 shows data for the manuscripts of original research. Overall, 26.8% of the manuscripts *submitted* to  
45  
46 UfL were manuscripts of original research. Of all the manuscripts *rejected* by UfL, manuscripts of original  
47  
48 research constituted 36.9%. Of all *published* manuscripts initially rejected by UfL, manuscripts of original  
49  
50 research constituted 38.1%. The proportion between published manuscripts of original research and  
51  
52 manuscripts of original research rejected by UfL was 11.0%.  
53  
54

55  
56 As a measure of importance, the number of citations that each article received since its publication was also  
57  
58 studied. As the number of citations can differ significantly depending on the database searched, it was  
59  
60 considered relevant to search both Web of Science, Scopus and Google Scholar (1-3).

1  
2  
3  
4 For Web of Science, the median number of citations was 2; the inter-quartile range was 0.5-6. The total  
5 number of citations was 104. For Scopus, the median number of citations was 2; the inter-quartile range  
6 was 0.5-5.5. The total number of citations was 109. For Google Scholar, the median number of citation was  
7 3; the inter-quartile range was 1.5-9.5. The total number of citations was 153. Only two manuscripts have  
8 received more than 10 citations in all three databases.  
9  
10  
11  
12  
13  
14

## 16 Discussion

17  
18  
19  
20 This study found that 21 out of 198 manuscripts rejected by a non-English-language general medical journal  
21 were subsequently published in other journals. The majority of these manuscripts were published in  
22 specialty/subspecialty journals. Previous studies, dealing with specialty or subspecialty journals published in  
23 English, have reported publication rates of more than 40% (6).  
24  
25  
26  
27  
28  
29  
30

31 The majority of manuscripts submitted to UfL between 2002 and 2005 were non-systematic reviews. Most of  
32 these manuscripts were probably never resubmitted, at least not to international journals. Methodological  
33 inadequacies, lack of originality or focus on local issues could be reasons for rejecting such manuscripts - if  
34 they were to be resubmitted.  
35  
36  
37  
38

39 Manuscripts of original research were most often published (c.f. figure 1b and table 3). Authors of original  
40 research manuscripts might be more persistent and intent on getting published; the process of translating  
41 and resubmitting might not be a barrier for authors who already put a lot of efforts into the research  
42 process. For editors, there is an ethical responsibility to publish manuscripts of original research, not least  
43 when the findings are of interest to an international audience.  
44  
45  
46  
47  
48  
49  
50

51 Previous studies have dealt with specialty or subspecialty journals for which reason it has been more obvious  
52 to compare impact factors (between journals within the same field). Overall, it seems that publication is  
53 attempted first in a journal with a relatively high impact factor. If the manuscript is rejected, it is then  
54 submitted to a journal with higher acceptance rate and lower (or no) impact factor, e.g. to national journals  
55 publishing in non-English like UfL. If the manuscript is rejected again, there are not many places left to go.  
56  
57  
58  
59  
60

1  
2  
3  
4 In theory, this could explain some of the discrepancies between the findings of this study and those of  
5  
6 previous studies (all dealing with high impact journals with low acceptance rates).  
7  
8

9  
10 Previous studies have searched only PubMed for rejected manuscripts. This involves a risk of missing  
11  
12 manuscripts published in journals not indexed in this database. When searching for medical literature,  
13  
14 Embase is generally regarded an important supplement to PubMed, especially when it comes to European  
15  
16 literature (7-10). Searching both PubMed and Embase was important in the present study as two additional  
17  
18 manuscripts were retrieved by searching Embase. However, even when searching both databases, the  
19  
20 number of search results (published manuscripts) would most likely be an underestimate as some  
21  
22 manuscripts could be published in non-indexed journals – a major limitation to this study.  
23

24  
25 Another limitation of the study was the potential risk of not identifying all indexed articles. When searching  
26  
27 PubMed and Embase, the first author's surname and initials were initially tried. If an author had a very  
28  
29 common name – or a long list of publications – a combination with either the last author's name or a subject  
30  
31 keyword was tried. This approach should limit the number of overlooked manuscripts; yet, spelling  
32  
33 differences and/or changes in the number or order of authors could lead to an underestimation of the  
34  
35 number of manuscripts published in indexed journals.  
36  
37

38  
39 This study differs significantly from previous studies because it deals with a general medical journal  
40  
41 published in small language (Danish is spoken by only 0.08% of the world population (11;12)). Previous  
42  
43 studies have focused on specialty/subspecialty journals published in English. It seems like a reasonable  
44  
45 assumption that language, including translation of manuscripts, could be a potential barrier for resubmission  
46  
47 to other journals.  
48

49  
50 In a broader perspective, this implies that scientific results initially communicated in a small language have  
51  
52 international reach only in rare instances. Scientific journals publishing in small languages should  
53  
54 acknowledge this problem and consider possible solutions. Since 2009, UfL has published all original articles  
55  
56 in English in the open-access journal Danish Medical Bulletin (13;14). Whether a mono- or bilingual  
57  
58 approach is chosen, the aim should be to facilitate the communication of science.  
59  
60

1  
2  
3  
4  
5  
6  
7  
8  
9  
10  
11  
12  
13  
14  
15  
16  
17  
18  
19  
20  
21  
22  
23  
24  
25  
26  
27  
28  
29  
30  
31  
32  
33  
34  
35  
36  
37  
38  
39  
40  
41  
42  
43  
44  
45  
46  
47  
48  
49  
50  
51  
52  
53  
54  
55  
56  
57  
58  
59  
60

### **Author contributions**

SV and JR made substantial contributions to conception and design, SV was responsible for acquisition of data and initial analysis, SV and JR participated in the interpretation of data; SV drafted the article, and SV and JR revised it critically for important intellectual content; SV and JR gave final approval of the version to be published.

SV had full access to all of the data in the study and takes responsibility for the integrity of the data and the accuracy of the data analysis.

For peer review only

## Reference List

- 1  
2  
3  
4  
5  
6  
7 (1) Elsevier. SciVerse Scopus. [http://www info sciverse com/scopus](http://www.info.sciverse.com/scopus) 2011 May 5
- 8  
9 (2) Google. Google Scholar. [http://scholar google dk/](http://scholar.google.dk/) 2011 March 14
- 10  
11 (3) ISI Web of Knowledge. Web of Science. [http://apps isiknowledge com ep fjernadgang kb](http://apps.isiknowledge.com/ep/fjernadgang/kb/dk/WOS_GeneralSearch_input.do?product=WOS&search_mode=GeneralSearch&SID=R2pIPf75MpOIaOmolC@&preferencesSaved=)  
12 [dk/WOS\\_GeneralSearch\\_input](http://apps.isiknowledge.com/ep/fjernadgang/kb/dk/WOS_GeneralSearch_input.do?product=WOS&search_mode=GeneralSearch&SID=R2pIPf75MpOIaOmolC@&preferencesSaved=)  
13 [do?product=WOS&search\\_mode=GeneralSearch&SID=R2pIPf75MpOIaOmolC@&preferenc](http://apps.isiknowledge.com/ep/fjernadgang/kb/dk/WOS_GeneralSearch_input.do?product=WOS&search_mode=GeneralSearch&SID=R2pIPf75MpOIaOmolC@&preferencesSaved=)  
14 [esSaved=](http://apps.isiknowledge.com/ep/fjernadgang/kb/dk/WOS_GeneralSearch_input.do?product=WOS&search_mode=GeneralSearch&SID=R2pIPf75MpOIaOmolC@&preferencesSaved=) 2011
- 15  
16 (4) Kulkarni AV, Aziz B, Shams I, Busse JW. Comparisons of Citations in Web of Science,  
17 Scopus, and Google Scholar for Articles Published in General Medical Journals. *Jama-*  
18 *Journal of the American Medical Association* 2009;302(10):1092-6.
- 19  
20 (5) ISI Web of Knowledge. Journal Citation Reports. [http://admin-apps isiknowledge com ep](http://admin-apps.isiknowledge.com/ep/fjernadgang/kb/dk/JCR/JCR?PointOfEntry=Home&SID=N115PeIPck2NBnb88i3)  
21 [fjernadgang kb dk/JCR/JCR?PointOfEntry=Home&SID=N115PeIPck2NBnb88i3](http://admin-apps.isiknowledge.com/ep/fjernadgang/kb/dk/JCR/JCR?PointOfEntry=Home&SID=N115PeIPck2NBnb88i3) 2011 March  
22 14
- 23  
24 (6) Wijnhoven BP, Dejong CH. Fate of manuscripts declined by the British Journal of Surgery.  
25 *Br J Surg* 2010 Mar;97(3):450-4.
- 26  
27 (7) Fangerau H. Finding European bioethical literature: an evaluation of the leading abstracting  
28 and indexing services. *J Med Ethics* 2004 Jun;30(3):299-303.
- 29  
30 (8) Wilkins T, Gillies RA, Davies K. EMBASE versus MEDLINE for family medicine searches: can  
31 MEDLINE searches find the forest or a tree? *Can Fam Physician* 2005 Jun;51:848-9.
- 32  
33 (9) Kelly L, St Pierre-Hansen N. So many databases, such little clarity: Searching the literature  
34 for the topic aboriginal. *Can Fam Physician* 2008 Nov;54(11):1572-3.
- 35  
36 (10) Woods D, Trewheellar K. Medline and Embase complement each other in literature  
37 searches. *BMJ* 1998 Apr 11;316(7138):1166.
- 38  
39 (11) Wikipedia. Languages by number of native speakers. [http://en wikipedia](http://en.wikipedia.org/wiki/List_of_languages_by_number_of_native_speakers)  
40 [org/wiki/List\\_of\\_languages\\_by\\_number\\_of\\_native\\_speakers](http://en.wikipedia.org/wiki/List_of_languages_by_number_of_native_speakers) 2011 May 5
- 41  
42 (12) Wikipedia. World population. [http://en wikipedia](http://en.wikipedia.org/wiki/World_population) [org/wiki/World\\_population](http://en.wikipedia.org/wiki/World_population) 2011 May 5
- 43  
44 (13) Rosenberg J. [Danish versus English in Ugeskrift for Laeger]. *Ugeskr Laeger* 2009 Jun  
45 1;171(23):1911.
- 46  
47 (14) Danish Medical Bulletin. Danish Medical Bulletin. [www danmedbul dk](http://www.danmedbul.dk) 2011
- 48  
49 (15) [www.ulrichsweb.com](http://www.ulrichsweb.com). Global series directory. [http://www ulrichsweb com ep fjernadgang](http://www.ulrichsweb.com/ep/fjernadgang/kb/dk/ulrichsweb/Search/fullCitation.asp?navPage=1&tab=1&serial_uid=18616&issn=00415782)  
50 [kb dk/ulrichsweb/Search/fullCitation](http://www.ulrichsweb.com/ep/fjernadgang/kb/dk/ulrichsweb/Search/fullCitation.asp?navPage=1&tab=1&serial_uid=18616&issn=00415782)  
51 [asp?navPage=1&tab=1&serial\\_uid=18616&issn=00415782](http://www.ulrichsweb.com/ep/fjernadgang/kb/dk/ulrichsweb/Search/fullCitation.asp?navPage=1&tab=1&serial_uid=18616&issn=00415782) 2011 March 14
- 52  
53  
54  
55  
56  
57  
58  
59  
60



1  
2  
3  
4  
5  
6  
7  
8  
9  
10  
11  
12  
13  
14  
15  
16  
17  
18  
19  
20  
21  
22  
23  
24  
25  
26  
27  
28  
29  
30  
31  
32  
33  
34  
35  
36  
37  
38  
39  
40  
41  
42  
43  
44  
45  
46  
47  
48  
49  
50  
51  
52  
53  
54  
55  
56  
57  
58  
59  
60

Table 1: Manuscripts – submitted, rejected and published elsewhere

| <i>Year</i> | <i>Submitted manuscripts</i> | <i>Rejected manuscripts</i> | <i>Rejected manuscripts (% of submissions)</i> | <i>Manuscripts subsequently published elsewhere</i> | <i>Published elsewhere (% of rejected manuscripts)</i> |
|-------------|------------------------------|-----------------------------|------------------------------------------------|-----------------------------------------------------|--------------------------------------------------------|
| 2002        | 555                          | 58                          | 10.5                                           | 7                                                   | 12.1                                                   |
| 2003        | 707                          | 51                          | 7.2                                            | 8                                                   | 15.7                                                   |
| 2004        | 585                          | 52                          | 8.9                                            | 4                                                   | 7.7                                                    |
| 2005        | 593                          | 37                          | 6.2                                            | 2                                                   | 5.4                                                    |
| Total       | 2440                         | 198                         | 8.1                                            | 21                                                  | 10.6                                                   |

For peer review only

Table 2: Characteristics of the publishing journals

| <i>Journal</i>                                            | <i>Year of publication</i> | <i>Impact factor*</i> | <i>Subject of journal (15)</i>                                                     | <i>Language of journal</i> |
|-----------------------------------------------------------|----------------------------|-----------------------|------------------------------------------------------------------------------------|----------------------------|
| Acta Radiologica                                          | 2006                       | 0.884                 | Radiology and nuclear medicine                                                     | English                    |
| Acupuncture in Medicine                                   | 2002                       |                       | Alternative medicine                                                               | English                    |
| American journal of cancer (ceased)                       | 2004                       |                       | Oncology                                                                           | English                    |
| American journal of case reports                          | 2008                       |                       | Medical sciences                                                                   | English                    |
| Archives of gynecology and obstetrics                     | 2006                       | 0.666 (2007)          | Obstetrics and gynecology                                                          | English                    |
| Basic and clinical pharmacology & toxicology**            | 2003+<br>2004              | 1.489 (2005)          | Pharmacy, pharmacology; environmental studies, toxicology and environmental safety | English                    |
| Clinical rheumatology                                     | 2008                       | 1.559                 | Rheumatology                                                                       | English                    |
| Current medical research and opinion                      | 2006                       | 3.062                 | Medical sciences                                                                   | English                    |
| Homeopathy                                                | 2006                       | 1.041 (2008)          | Chiropractic, homeopathy, osteopathy                                               | English                    |
| International journal for quality in health care          | 2004                       | 1.138 (2005)          | Medical sciences                                                                   | English                    |
| International Journal of Hygiene and Environmental Health | 2007                       | 1.621                 | Public health and safety                                                           | English                    |
| International urology and nephrology                      | 2007                       | 0.482                 | Urology and nephrology                                                             | English                    |
| Journal of clinical densitometry                          | 2005                       | 1.871                 | Medical sciences                                                                   | English                    |
| Medical hypotheses                                        | 2005                       | 0.92                  | Medical sciences                                                                   | English                    |
| International Journal of Clinical Pharmacy***             | 2006                       | 0.941                 | Pharmacy and pharmacology                                                          | English                    |
| Scandinavian journal of infectious diseases               | 2003                       | 1.308 (2005)          | Communicable diseases                                                              | English                    |
| Scandinavian journal of primary health care               | 2006                       | 1.541                 | Nurses and nursing; health facilities and administration                           | English                    |
| Surgical laparoscopy endoscopy & percutaneous techniques  | 2005                       | 0.865                 | Surgery; gastroenterology; obstetrics and gynecology                               | English                    |
| Vaccine                                                   | 2004                       | 2.822 (2005)          | Allergology and immunology; veterinary science                                     | English                    |

\* IF from the year the manuscript was published. If the journal was not yet rated for impact, the "oldest" IF was recorded (year in brackets).

\*\*formerly Pharmacology and Toxicology; \*\*\*formerly Pharmacy world and science

1  
2  
3  
4  
5  
6  
7  
8  
9  
10  
11  
12  
13  
14  
15  
16  
17  
18  
19  
20  
21  
22  
23  
24  
25  
26  
27  
28  
29  
30  
31  
32  
33  
34  
35  
36  
37  
38  
39  
40  
41  
42  
43  
44  
45  
46  
47  
48  
49  
50  
51  
52  
53  
54  
55  
56  
57  
58  
59  
60

Table 3: Manuscripts of original research

| Year  | Submitted original manuscripts out of total number of submitted manuscripts (%) | Rejected original manuscripts out of total number of rejected manuscripts (%) | Published original manuscripts out of total number of published manuscripts (%) | Published original manuscripts out of rejected original manuscripts (%) |
|-------|---------------------------------------------------------------------------------|-------------------------------------------------------------------------------|---------------------------------------------------------------------------------|-------------------------------------------------------------------------|
| 2002  | 30,1                                                                            | 32,8                                                                          | 14,3                                                                            | 5,3                                                                     |
| 2003  | 27,0                                                                            | 45,1                                                                          | 37,5                                                                            | 13,0                                                                    |
| 2004  | 24,8                                                                            | 40,4                                                                          | 75,0                                                                            | 14,5                                                                    |
| 2005  | 25,5                                                                            | 27,0                                                                          | 50,0                                                                            | 10,0                                                                    |
| Total | <b>26,8</b>                                                                     | <b>36,9</b>                                                                   | <b>38,1</b>                                                                     | <b>11,0</b>                                                             |

For peer review only

**STROBE 2007 (v4) checklist of items to be included in reports of observational studies in epidemiology\***  
**Checklist for cohort, case-control, and cross-sectional studies (combined)**

| Section/Topic             | Item # | Recommendation                                                                                                                                                                                                                                                                                                                                                                                                                                                         | Reported on page # |
|---------------------------|--------|------------------------------------------------------------------------------------------------------------------------------------------------------------------------------------------------------------------------------------------------------------------------------------------------------------------------------------------------------------------------------------------------------------------------------------------------------------------------|--------------------|
| Title and abstract        | 1      | (a) Indicate the study's design with a commonly used term in the title or the abstract                                                                                                                                                                                                                                                                                                                                                                                 | 1                  |
|                           |        | (b) Provide in the abstract an informative and balanced summary of what was done and what was found                                                                                                                                                                                                                                                                                                                                                                    | 2                  |
| <b>Introduction</b>       |        |                                                                                                                                                                                                                                                                                                                                                                                                                                                                        |                    |
| Background/rationale      | 2      | Explain the scientific background and rationale for the investigation being reported                                                                                                                                                                                                                                                                                                                                                                                   | 4                  |
| Objectives                | 3      | State specific objectives, including any pre-specified hypotheses                                                                                                                                                                                                                                                                                                                                                                                                      | 4                  |
| <b>Methods</b>            |        |                                                                                                                                                                                                                                                                                                                                                                                                                                                                        |                    |
| Study design              | 4      | Present key elements of study design early in the paper                                                                                                                                                                                                                                                                                                                                                                                                                | 4-5                |
| Setting                   | 5      | Describe the setting, locations, and relevant dates, including periods of recruitment, exposure, follow-up, and data collection                                                                                                                                                                                                                                                                                                                                        |                    |
| Participants              | 6      | (a) <i>Cohort study</i> —Give the eligibility criteria, and the sources and methods of selection of participants. Describe methods of follow-up<br><i>Case-control study</i> —Give the eligibility criteria, and the sources and methods of case ascertainment and control selection. Give the rationale for the choice of cases and controls<br><i>Cross-sectional study</i> —Give the eligibility criteria, and the sources and methods of selection of participants | 4-5                |
|                           |        | (b) <i>Cohort study</i> —For matched studies, give matching criteria and number of exposed and unexposed<br><i>Case-control study</i> —For matched studies, give matching criteria and the number of controls per case                                                                                                                                                                                                                                                 |                    |
| Variables                 | 7      | Clearly define all outcomes, exposures, predictors, potential confounders, and effect modifiers. Give diagnostic criteria, if applicable                                                                                                                                                                                                                                                                                                                               | 5                  |
| Data sources/ measurement | 8*     | For each variable of interest, give sources of data and details of methods of assessment (measurement). Describe comparability of assessment methods if there is more than one group                                                                                                                                                                                                                                                                                   |                    |
| Bias                      | 9      | Describe any efforts to address potential sources of bias                                                                                                                                                                                                                                                                                                                                                                                                              |                    |
| Study size                | 10     | Explain how the study size was arrived at                                                                                                                                                                                                                                                                                                                                                                                                                              |                    |
| Quantitative variables    | 11     | Explain how quantitative variables were handled in the analyses. If applicable, describe which groupings were chosen and why                                                                                                                                                                                                                                                                                                                                           |                    |
| Statistical methods       | 12     | (a) Describe all statistical methods, including those used to control for confounding                                                                                                                                                                                                                                                                                                                                                                                  | 5                  |
|                           |        | (b) Describe any methods used to examine subgroups and interactions                                                                                                                                                                                                                                                                                                                                                                                                    |                    |
|                           |        | (c) Explain how missing data were addressed                                                                                                                                                                                                                                                                                                                                                                                                                            |                    |
|                           |        | (d) <i>Cohort study</i> —If applicable, explain how loss to follow-up was addressed<br><i>Case-control study</i> —If applicable, explain how matching of cases and controls was addressed                                                                                                                                                                                                                                                                              |                    |

|                          |     |                                                                                                                                                                                                                                                                                                                                                                                                               |     |
|--------------------------|-----|---------------------------------------------------------------------------------------------------------------------------------------------------------------------------------------------------------------------------------------------------------------------------------------------------------------------------------------------------------------------------------------------------------------|-----|
|                          |     | <i>Cross-sectional study</i> —If applicable, describe analytical methods taking account of sampling strategy                                                                                                                                                                                                                                                                                                  |     |
|                          |     | (e) Describe any sensitivity analyses                                                                                                                                                                                                                                                                                                                                                                         |     |
| <b>Results</b>           |     |                                                                                                                                                                                                                                                                                                                                                                                                               |     |
| Participants             | 13* | (a) Report numbers of individuals at each stage of study—eg numbers potentially eligible, examined for eligibility, confirmed eligible, included in the study, completing follow-up, and analysed<br>(b) Give reasons for non-participation at each stage<br>(c) Consider use of a flow diagram                                                                                                               | 6   |
| Descriptive data         | 14* | (a) Give characteristics of study participants (eg demographic, clinical, social) and information on exposures and potential confounders<br>(b) Indicate number of participants with missing data for each variable of interest<br>(c) <i>Cohort study</i> —Summarise follow-up time (eg, average and total amount)                                                                                           |     |
| Outcome data             | 15* | <i>Cohort study</i> —Report numbers of outcome events or summary measures over time<br><i>Case-control study</i> —Report numbers in each exposure category, or summary measures of exposure<br><i>Cross-sectional study</i> —Report numbers of outcome events or summary measures                                                                                                                             | 6   |
| Main results             | 16  | (a) Give unadjusted estimates and, if applicable, confounder-adjusted estimates and their precision (eg, 95% confidence interval). Make clear which confounders were adjusted for and why they were included<br>(b) Report category boundaries when continuous variables were categorized<br>(c) If relevant, consider translating estimates of relative risk into absolute risk for a meaningful time period | 6-7 |
| Other analyses           | 17  | Report other analyses done—eg analyses of subgroups and interactions, and sensitivity analyses                                                                                                                                                                                                                                                                                                                | 6-7 |
| <b>Discussion</b>        |     |                                                                                                                                                                                                                                                                                                                                                                                                               |     |
| Key results              | 18  | Summarise key results with reference to study objectives                                                                                                                                                                                                                                                                                                                                                      | 7-9 |
| Limitations              | 19  | Discuss limitations of the study, taking into account sources of potential bias or imprecision. Discuss both direction and magnitude of any potential bias                                                                                                                                                                                                                                                    | 7-9 |
| Interpretation           | 20  | Give a cautious overall interpretation of results considering objectives, limitations, multiplicity of analyses, results from similar studies, and other relevant evidence                                                                                                                                                                                                                                    | 7-9 |
| Generalisability         | 21  | Discuss the generalisability (external validity) of the study results                                                                                                                                                                                                                                                                                                                                         | 7-9 |
| <b>Other information</b> |     |                                                                                                                                                                                                                                                                                                                                                                                                               |     |
| Funding                  | 22  | Give the source of funding and the role of the funders for the present study and, if applicable, for the original study on which the present article is based                                                                                                                                                                                                                                                 |     |

\*Give information separately for cases and controls in case-control studies and, if applicable, for exposed and unexposed groups in cohort and cross-sectional studies.

**Note:** An Explanation and Elaboration article discusses each checklist item and gives methodological background and published examples of transparent reporting. The STROBE checklist is best used in conjunction with this article (freely available on the Web sites of PLoS Medicine at <http://www.plosmedicine.org/>, Annals of Internal Medicine at <http://www.annals.org/>, and Epidemiology at <http://www.epidem.com/>). Information on the STROBE Initiative is available at [www.strobe-statement.org](http://www.strobe-statement.org).

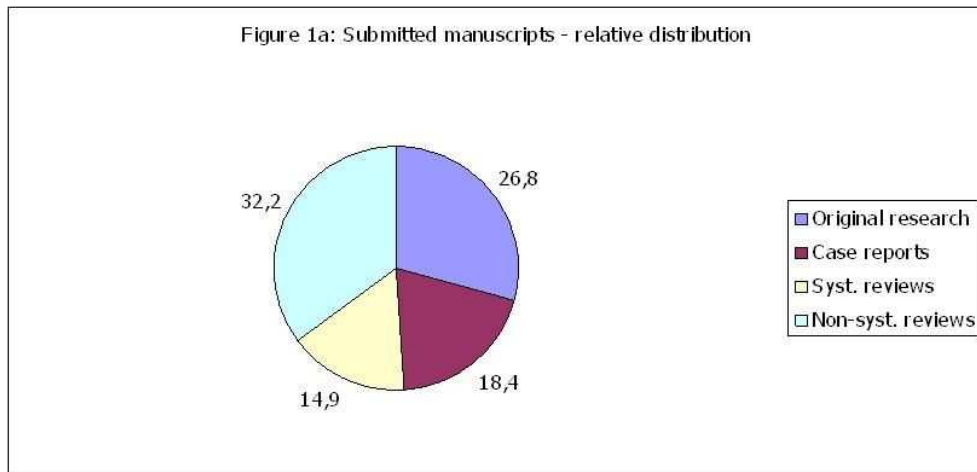

70x34mm (300 x 300 DPI)

er review only

1  
2  
3  
4  
5  
6  
7  
8  
9  
10  
11  
12  
13  
14  
15  
16  
17  
18  
19  
20  
21  
22  
23  
24  
25  
26  
27  
28  
29  
30  
31  
32  
33  
34  
35  
36  
37  
38  
39  
40  
41  
42  
43  
44  
45  
46  
47  
48  
49  
50  
51  
52  
53  
54  
55  
56  
57  
58  
59  
60

Figure 1b: Rejected manuscripts published elsewhere - relative distribution

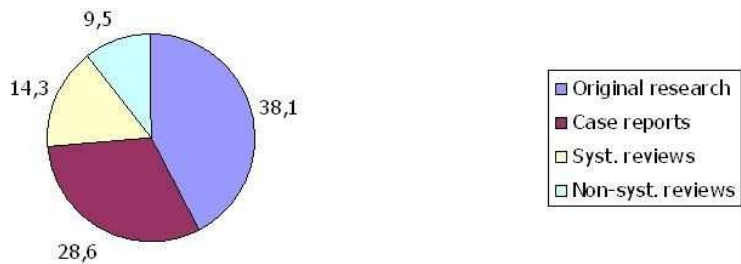

69x34mm (300 x 300 DPI)

er review only
